# 1 ***RNA-deficient TDP-43 causes loss of free nuclear TDP-43 by*** 2 ***sequestration***

3

4

5

## 6 **Author list and affiliations:**

7

8 **Sean S. Keating<sup>1</sup>**

9 Adekunle T. Bademosi<sup>1</sup>

10 Rebecca San Gil<sup>1,\*</sup>

11 Adam K. Walker<sup>1,\*</sup>

12

13 <sup>1</sup>Neurodegeneration Pathobiology Laboratory, Queensland Brain Institute, The University of Queensland,  
14 St Lucia, QLD 4072, Australia

15 \* corresponding authors: [r.sangil@uq.edu.au](mailto:r.sangil@uq.edu.au), [adam.walker@uq.edu.au](mailto:adam.walker@uq.edu.au)

16

17

## 18 **Abstract**

19 Dysfunction and aggregation of the RNA-binding protein, TDP-43, is the unifying hallmark of  
20 amyotrophic lateral sclerosis (ALS) and frontotemporal dementia (FTD). Mechanisms and relative  
21 contributions of concurrent TDP-43 nuclear depletion, cytoplasmic accumulation, and post-  
22 translational modification to neurodegeneration remain unresolved. We employed CRISPR/Cas9-  
23 mediated fluorescent tagging to investigate how disease-associated stressors and pathological  
24 TDP-43 alter abundance, localisation, self-assembly, aggregation, solubility, and mobility dynamics  
25 of endogenous TDP-43 over time. Oxidative stress stimulated TDP-43 liquid-liquid phase separation  
26 into droplets or spherical shell-like 'anisosomes', which were not formed by over-expressed wild-  
27 type TDP-43. Further, nuclear RNA-binding-ablated or acetylation-mimicking TDP-43 rapidly formed  
28 anisosomes and inclusions that readily sequestered and depleted free normal nuclear TDP-43. The  
29 majority of total endogenous TDP-43 was sequestered into anisosomes, but retained high protein  
30 mobility and solubility. However, cytoplasmic RNA-deficient TDP-43 formed large phosphorylated  
31 inclusions that occasionally sequestered endogenous TDP-43, rendering it insoluble and immobile,  
32 indicating irreversible pathological transition. These findings suggest that post-translational  
33 modification and RNA-binding deficiency exacerbate TDP-43 aggregation and dysfunction by driving  
34 sequestration, mislocalisation, and depletion of normal nuclear TDP-43 in ALS and FTD.

35

## 36 **Key words (5)**

37 Acetylated TDP-43 / Endogenous gene tagging / LLPS / RNA-binding protein / amyotrophic lateral  
38 sclerosis

39

40

## 1 Introduction

2 Pathological aggregation of TAR DNA-binding protein 43 (TDP-43) in neurons is a key hallmark of  
3 most amyotrophic lateral sclerosis (ALS) and approximately half of frontotemporal dementia (FTD)  
4 cases (Ling et al., 2013; Neumann et al., 2006). TDP-43 is an essential nuclear DNA-/RNA-binding  
5 protein that physiologically regulates stability, transport, splicing, and translation of many thousands  
6 of mRNA transcripts (Ayala et al., 2011b; Buratti and Baralle, 2010; Polymenidou et al., 2011;  
7 Tollervey et al., 2011). In disease, TDP-43 pathology likely forms via progressive pathogenic  
8 changes to TDP-43, critically involving its depletion from the nucleus, mislocalisation, misfolding,  
9 aberrant liquid-liquid phase separation, self-assembly, post-translational modification, and terminal  
10 deposition into inclusions (Keating et al., 2022). Cytoplasmic accumulation of TDP-43 has been  
11 regarded a primary driver of toxicity and cellular dysfunction (Barmada et al., 2010; Dyer et al.,  
12 2021), however loss of normal nuclear TDP-43 has also been reported in absence of cytoplasmic  
13 TDP-43 inclusions, within post-mortem FTD (Nana et al., 2019; Vatsavayai et al., 2016), and ALS  
14 brains (Braak and Del Tredici, 2018). Indeed, TDP-43 nuclear depletion can independently mediate  
15 neurodegeneration (Igaz et al., 2011), likely via dysregulation of TDP-43-dependent transcription  
16 (Liu et al., 2019) and mRNA splicing functions (Jeong et al., 2017; Polymenidou et al., 2011; Wu et  
17 al., 2019). However, nuclear loss and cytoplasmic accumulation of TDP-43 largely occur  
18 concurrently in disease models (Igaz et al., 2011; Walker et al., 2015), such that the relative  
19 contributions of these processes to neuronal dysfunction or toxicity remain elusive. It is unclear  
20 whether upstream disease-associated stressors or pathological accumulation of post-translationally  
21 modified forms of TDP-43 drive aberrant loss, mislocalisation, or aggregation of functional  
22 endogenous nuclear TDP-43, which could explain the rapid progression of pathology formation and  
23 neurodegeneration in ALS and FTD.

24  
25 Post-translational modifications (PTMs) are a major feature of TDP-43 pathology in ALS and FTD,  
26 and likely play diverse roles in TDP-43 dysfunction, aggregation, and toxicity. For example,  
27 phosphorylation of TDP-43 is a widely-recognised hallmark of disease (Neumann et al., 2006).  
28 Aberrantly acetylated TDP-43 also accumulates within cytoplasmic inclusions in ALS spinal cord  
29 tissue (Cohen et al., 2015; Kametani et al., 2016; Wang et al., 2017). Mimicking acetylation of TDP-  
30 43 via lysine-to-glutamine amino acid substitution at residues 145 and/or 192 increases formation of  
31 disease-reminiscent cytoplasmic inclusions that are phosphoTDP-43-, ubiquitin-, and Hsp70-positive  
32 (Chen and Cohen, 2019; Cohen et al., 2015; Wang et al., 2017). The location of these acetylated  
33 residues within the RNA-recognition motifs (RRMs) suggests that TDP-43 acetylation may lead to  
34 RNA-binding dysfunction (Cohen et al., 2015). Indeed, TDP-43 acetylation may decrease affinity for  
35 RNA by modifying electrostatic charges of nucleic acid-binding residues, indicated by loss of normal  
36 RNA splicing of TDP-43 target transcripts in cells expressing acetylation-mimicking TDP-43 (Cohen  
37 et al., 2015; Wang et al., 2017).

38  
39 Loss of TDP-43 RNA-binding capacity, through RRM mutation or acetylation, thereby promotes  
40 aberrant self-assembly and pathological aggregation (Chen et al., 2019; Gasset-Rosa et al., 2019;

1 Hallegger et al., 2021; Maharana et al., 2018; Mann et al., 2019; McGurk et al., 2018; Pérez-  
2 Berlanga et al., 2022; Yu et al., 2021). This is further supported by findings that TDP-43 species  
3 lacking RRM, or containing ALS-associated RRM mutations, demonstrate high aggregation  
4 propensity and toxicity (Shenoy et al., 2020; Wei et al., 2017). Disruption of regular TDP-43-RNA  
5 interactions has revealed an intrinsic instability of the RRM (Flores et al., 2019; Vivoli-Vega et al.,  
6 2020; Zacco et al., 2018), which influences TDP-43 folding states and phase transitions (Huang et  
7 al., 2013; Mann et al., 2019). TDP-43 RNA-binding status therefore directs self-assembly into  
8 various heterogenous biomolecular condensates, characterised by 'liquid-like' mobility of comprising  
9 proteins and exchange with surrounding intracellular TDP-43, mediated by liquid-liquid phase  
10 separation (LLPS) (Hallegger et al., 2021; Li et al., 2018; Molliex et al., 2015). RNA-binding-ablated  
11 or acetylation-mimicking TDP-43 variants in the nucleus have been shown to undergo a distinct form  
12 of LLPS, assembling RNA-deficient spherical shell-like structures, termed 'anisosomes', which  
13 require recruitment of molecular chaperones to maintain structure and solubility (Yu et al., 2021).  
14 Anisosome formation with normal endogenous TDP-43 may also be induced by proteolytic stress  
15 (Yu et al., 2021). However, real-time endogenous TDP-43 anisosome formation has not been  
16 thoroughly characterised in live cells, and it remains unclear whether other disease-associated  
17 stressors trigger anisosome assembly in human disease.

18  
19 Oxidative stress is another ALS and FTD pathomechanism linking LLPS to pathological aggregation  
20 and nuclear depletion of TDP-43 (Gasset-Rosa et al., 2019; Gu et al., 2021; Maharana et al., 2018;  
21 Mann et al., 2019; McGurk et al., 2018). Oxidative stress is observed in brain, spinal cord, muscle  
22 and serum of ALS patients (McGurk et al., 2018; Ratti et al., 2020), and has been shown to induce  
23 redistribution or loss of nuclear TDP-43 as well as inclusion formation in various disease models  
24 (Ayala et al., 2011a; Dewey et al., 2011; Goh et al., 2018; Iguchi et al., 2012; Lei et al., 2018; Wang  
25 et al., 2016; Zuo et al., 2021). For example, under oxidative stress, cells form stress granules (SGs)  
26 – reversible cytoplasmic ribonucleoprotein complexes that limit non-essential protein translation by  
27 sequestering mRNAs and disassembled polyribosomes – involving recruitment of TDP-43 and other  
28 RNA-binding proteins (Colombrita et al., 2009; Fang et al., 2019; Khalfallah et al., 2018; Liu-  
29 Yesucevitz et al., 2010; Mazan-Mamczarz et al., 2006; Ratti et al., 2020). Assembly of TDP-43-  
30 containing SGs or other membraneless organelles is mediated by LLPS, which critically allows for  
31 disassembly following stress recovery (Mann et al., 2019; Zhang et al., 2019). TDP-43 may also  
32 undergo SG-independent LLPS under oxidative stress to form nuclear or cytoplasmic liquid-like  
33 droplets that do not associate with RNA substrates or SG markers (Gasset-Rosa et al., 2019; Gu et  
34 al., 2021; Mann et al., 2019). Mechanisms and interacting components for SG-independent LLPS  
35 are less clear, however may be related to stress-induced mislocalisation of RNA transcripts, as  
36 shown in induced pluripotent stem cell-derived motor neuron progenitors (Markmiller et al., 2021),  
37 which likely drives TDP-43 instability and self-assembly.

38  
39 Chronic assembly of both TDP-43-positive SGs (McGurk et al., 2018; Ratti et al., 2020; Zhang et al.,  
40 2019), and RNA-/SG-independent TDP-43 structures (Chen and Cohen, 2019; Gasset-Rosa et al.,

1 2019; Mann et al., 2019; McGurk et al., 2018; Yu et al., 2021; Zhang et al., 2019) results in  
2 conversion of reversible dynamic liquid-like structures into gel-like or solid immobile assemblies,  
3 which may potentially seed TDP-43 aggregation. Aberrant LLPS or disruption of protein dynamics  
4 may therefore lead to irreversible pathological transitions, denoted by loss of protein mobility.  
5 Interestingly, TDP-43 acetylation may be promoted by oxidative stress, and acetylation-mimicking  
6 TDP-43 forms cytoplasmic inclusions lacking SG markers (Chen and Cohen, 2019), which may be  
7 related to aberrant SG-independent LLPS. Therefore, acetylation or oxidative stress may drive TDP-  
8 43 condensation and deplete soluble free nuclear TDP-43 levels, however it is unclear whether  
9 TDP-43 LLPS and confinement within these liquid-like structures significantly alters normal TDP-43  
10 dynamics, functional capacity, and pathological aggregation.

11  
12 Depletion of functional, nuclear TDP-43 in disease could be driven by accumulation of TDP-43  
13 protein through changes in endogenous TDP-43 expression, or sequestration into pathological  
14 inclusions or other phase-separated TDP-43 assemblies. Auto-regulation of *TARDBP* expression is  
15 mediated by TDP-43 binding its own mRNA (Ayala et al., 2011b; Hallegger et al., 2021; Koehler et  
16 al., 2022), as seen in disease models with decreased endogenous TDP-43 protein upon over-  
17 expression of wild-type or cytoplasmic TDP-43 (Igaz et al., 2011; Porta et al., 2018; Walker et al.,  
18 2015; Watkins et al., 2021; Winton et al., 2008). Additionally, it has been shown that exogenous  
19 wild-type TDP-43 becomes incorporated into cytoplasmic TDP-43 structures in cells (Che et al.,  
20 2015; Gasset-Rosa et al., 2019; Lu et al., 2021; Porta et al., 2018), resembling pathological  
21 inclusions observed in ALS and FTLTDP that contain natively-folded TDP-43 (Chen et al., 2019;  
22 Cohen et al., 2015; Flores et al., 2019; Maurel et al., 2018; Zacco et al., 2018). However, it is  
23 unclear whether normal endogenous TDP-43 is sequestered into pathological TDP-43 structures,  
24 and whether such sequestration could deplete overall nuclear levels and impair the dynamic  
25 properties of endogenous TDP-43.

26  
27 In this study, we therefore sought to determine how disease-related stressors and RNA-binding  
28 ablation or acetylation of pathological TDP-43 affect endogenous TDP-43 levels, self-assembly,  
29 recruitment to puncta and inclusions, and mobility dynamics in the nucleus and cytoplasm of cells.  
30 We used CRISPR/Cas9 gene-editing to develop cell lines with differential fluorescent protein  
31 insertions across multiple *TARDBP* alleles. We found that oxidative stress caused fluorescently-  
32 tagged endogenous TDP-43 protein to assemble into various biomolecular condensates, including  
33 SGs, dynamic liquid-like nuclear droplets, or anisosomes, over time. Notably, over-expression and  
34 aggregation of RNA-binding-ablated, or acetyl-mimicking TDP-43 drives nuclear depletion of  
35 endogenous TDP-43, via concentration-dependent sequestration into inclusions, puncta or  
36 anisosomes. This specific sequestration into large, phosphorylated nuclear or cytoplasmic inclusions  
37 formed by acetylated TDP-43 led to insolubility and immobility of endogenous TDP-43, indicating  
38 irreversible pathological transition. The most dramatic sequestration was caused through formation  
39 of nuclear anisosomes comprised of acetylation-mimicking TDP-43, while endogenous TDP-43  
40 recruited to these dynamic structures remained highly mobile. Our findings therefore suggest that

1 both acetylation and RNA-binding ablation increase TDP-43 aggregation propensity, and also cause  
2 a loss of free normal nuclear TDP-43 by promoting its mislocalisation and sequestration into  
3 pathological assemblies, thereby driving TDP-43 dysfunction and further aggregation in ALS and  
4 FTD.

5

## 6 Results

### 7 Generation and validation of TDP-43-reporter cell lines using CRISPR/Cas9-mediated 8 multiple allele fluorescence tagging of the endogenous *TARDBP* locus

9 To visualise and quantify the spatiotemporal dynamics of endogenous TDP-43, we inserted  
10 fluorescent tags to the *TARDBP* C-terminus in single or multiple alleles using CRISPR/Cas9-  
11 mediated homology-directed repair (Figure 1A). We exploited the hypertriploid karyotype (i.e.,  
12 multiple copies of the *TARDBP* allele) of HEK293T cells (Lin et al., 2014) to generate three different  
13 fluorescently-tagged *TARDBP* cell lines, by mixing *mAvicFP1* and *mCherry* DNA donor templates in  
14 a single reaction (Figure 1B,C; Supplementary Figure 1). *mAvicFP1* is a recently discovered  
15 fluorescent protein, derived from *Aequorea victoria*, which has 80% homology to traditional GFP, but  
16 produces brighter chromophores and is amenable to single-molecule microscopy (Lambert et al.,  
17 2019). Our approach resulted in a polyclonal population of cells with expression of TDP-43 tagged  
18 with *mAvicFP1* or *mCherry*, either alone or in combination, from donor integration across multiple  
19 *TARDBP* alleles (Figure 1D). Fluorescence-activated cell sorting revealed 4.74% of cells were  
20 *mAvicFP1*-positive, 4.17% were *mCherry*-positive, and 0.54% were both *mAvicFP1*- and *mCherry*-  
21 positive, or 'dual-tagged', with the remainder (90.5%) unedited (Figure 1E).

22

23 To validate the efficiency and accuracy of the multi-allelic CRISPR/Cas9 gene insertion, we  
24 analysed RIPA-soluble protein and genomic DNA from two candidate clonal cell lines that were of  
25 low-, medium-, or high-fluorescence intensity for each of *TARDBP-mAvicFP1*, *TARDBP-mCherry*, or  
26 dual-tagged *TARDBP-mAvicFP1* plus *TARDBP-mCherry*. Immunoblotting for TDP-43 revealed  
27 multiple bands that differed in molecular weight, including 'untagged' TDP-43 (43 kDa) or high-  
28 molecular-weight tagged TDP-43-*mAvicFP1* (~72kDa) and TDP-43-*mCherry* (~74 kDa) fusion  
29 proteins (Figure 2A). Probing for *myc*, which was inserted in the linker sequence, confirmed that  
30 higher-molecular-weight TDP-43 bands were CRISPR edited fluorescently-tagged fusion proteins.  
31 To estimate the proportion of *TARDBP* loci with or without insertion, we calculated an 'editing ratio'  
32 for each clone, by dividing the combined densitometry signals of 72/74 kDa tagged-TDP-43 by the  
33 sum of all TDP-43 bands (Figure 2B-D, Supplementary Figure 2). For example, an editing ratio of  
34 1.0 indicates complete CRISPR insertion across all alleles, as seen with *TARDBP-mAvicFP1*-  
35 *mCherry* clone C4 (Figure 2D), which also showed the highest fluorescence intensity of the  
36 representative clones (Figure 2E). *TARDBP-mCherry* clone B8 had an editing ratio of ~0.5,  
37 suggesting that half of *TARDBP* alleles possessed an *mCherry* tag (Figure 2A and B). *TARDBP*  
38 editing ratio generally correlated with fluorescence intensity of each monoclonal cell line observed  
39 by confocal microscopy, which also revealed the expected sub-nuclear distribution of TDP-43 with  
40 exclusion from nucleoli (Figure 2E). Finally, we performed Sanger sequencing on genomic DNA

1 from clonal cell lines of the highest editing efficiency. The DNA donor templates, including *FLAG-*  
 2 *myc* linker and *mAvcFP1* or *mCherry* sequences, were precisely inserted at the intended C-terminal  
 3 *TARDBP* Exon 6 locus (Supplementary Figure 3).

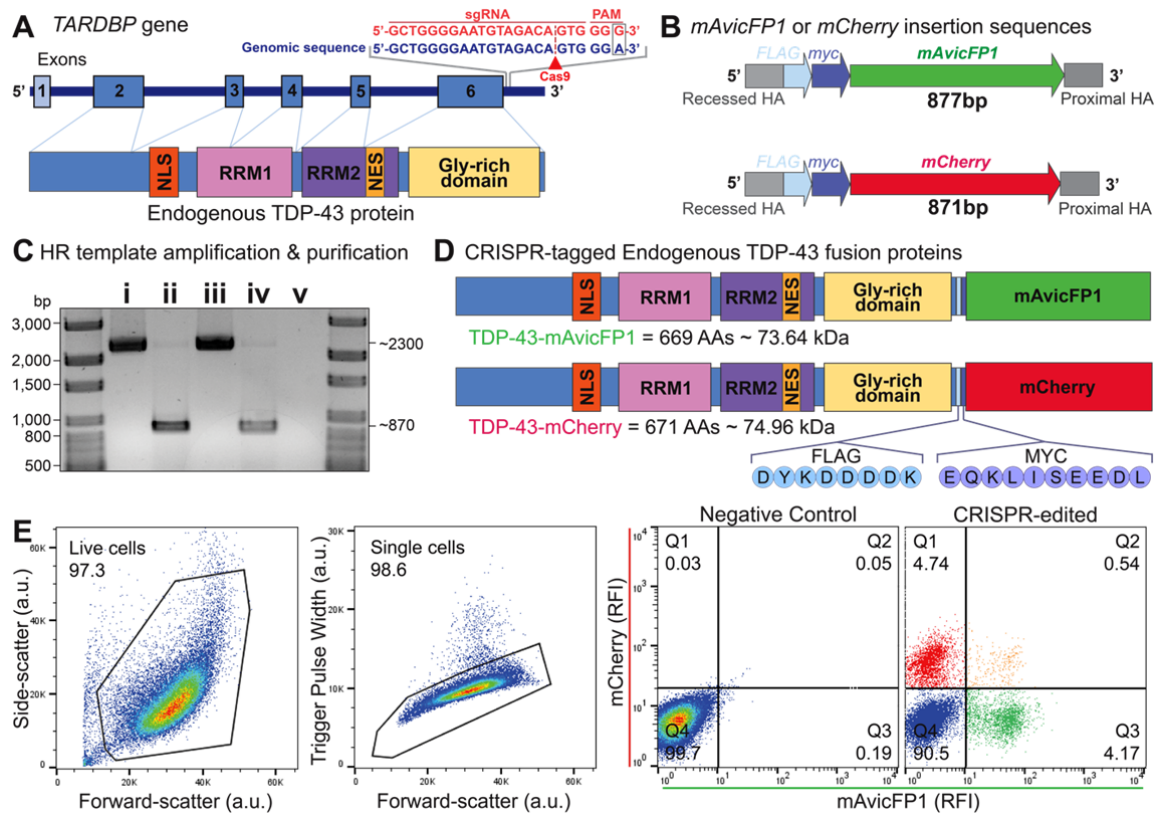

4 **Figure 1. CRISPR/Cas9-mediated gene editing for single and dual insertion of *mAvcFP1* or *mCherry* to**  
 5 **endogenous *TARDBP* C-termini.** (A) Schematic of endogenous *TARDBP* gene and protein structure,  
 6 including the sgRNA target site and mutated PAM sequence (red text) that guides Cas9 (red arrowhead) for  
 7 DNA double-stranded breaks at the C-terminus of *TARDBP* (blue text). (B) Schematic of double-stranded  
 8 DNA donor insertion sequence design and (C) DNA electrophoresis of (i) *mAvcFP1* plasmid, (ii) *mAvcFP1*  
 9 PCR amplicon donor template, (iii) *mCherry* plasmid, (iv) *mCherry* PCR amplicon donor template, and (v)  
 10 non-template control. (D) Schematic of the expected protein products of CRISPR/Cas9-mediated gene  
 11 insertion, endogenous TDP-43-*mAvcFP1* and TDP-43-*mCherry* fusion proteins, including amino acid (AA)  
 12 length and predicted protein size. (E) Fluorescence-activated cell sorting of nucleoporated HEK293T cells. *Left*  
 13 *to right*: plot of forward- and side-scatter resolves live cells (a.u., arbitrary units), plot of forward-scatter and  
 14 trigger pulse width resolves single cells. Representative plots of *mAvcFP1* and *mCherry* relative fluorescence  
 15 intensity (RFI) from negative control and polyclonal CRISPR-edited samples. Quadrant gating was set using  
 16 the negative control.  
 17  
 18

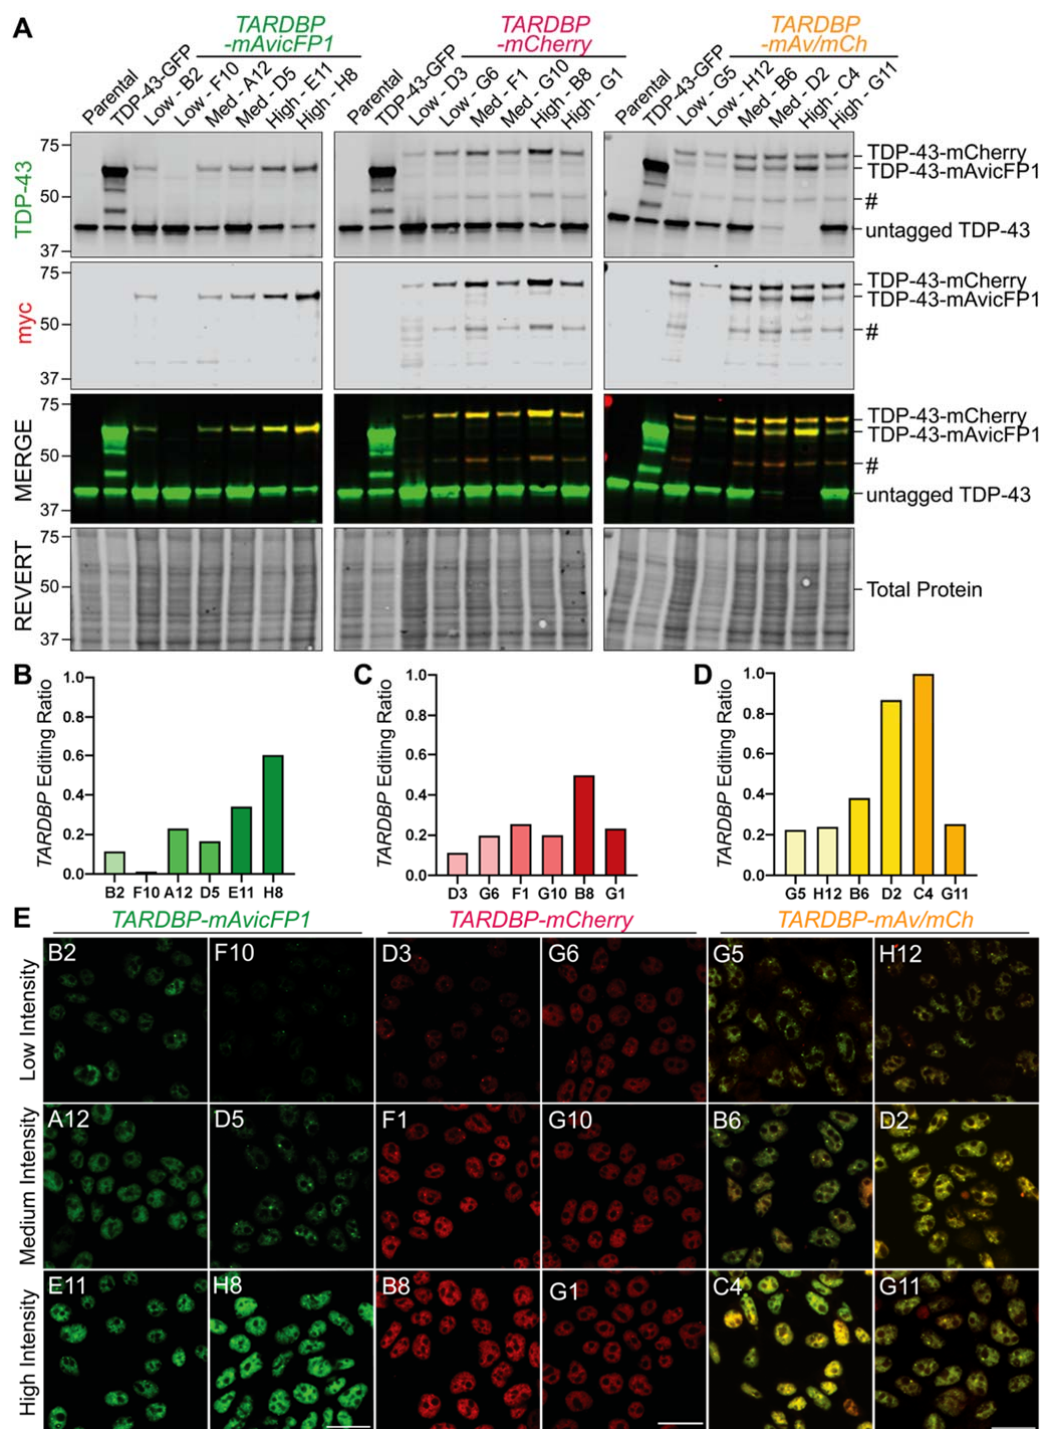

1  
2 **Figure 2. Expression of high-molecular weight TDP-43 protein verifies successful CRISPR/Cas9-**  
3 **mediated gene insertion of *mAvcFP1* and/or *mCherry* to *TARDBP* alleles.** Two monoclonal cell lines of  
4 low, medium, or high intensity were selected. **(A)** Immunoblotting for TDP-43 and myc revealed the  
5 abundance of untagged (43kDa) and tagged TDP-43 (72-74kDa), which was quantified by densitometry  
6 analysis. CRISPR-editing ratios for **(B)** *TARDBP-mAvcFP1*, **(C)** *TARDBP-mCherry*, or **(D)** *TARDBP-*  
7 *mAvcFP1-mCherry* monoclonal cell lines were calculated by dividing the total protein-normalised signals of  
8 high-molecular weight tagged TDP-43 by the combined signals of all TDP-43 bands, as described in  
9 Supplementary Figure 2. # represents a lower-molecular-weight band positive for endogenous mCherry-  
10 tagged TDP-43. **(E)** Representative confocal images captured at 63x magnification depicting relative  
11 fluorescence intensities of *TARDBP*-tagged cell lines, with clone names indicated in the upper left corner; note  
12 that *TARDBP-mAv/mCh* images are displayed as a merge of separate *mAvcFP1* and *mCherry* channels;  
13 scale = 20µm.  
14

1 Fluorescently-tagged endogenous TDP-43 exhibits characteristic protein localisation, self-  
2 assembly, and mobility dynamics under physiological conditions or oxidative stress

3 To determine whether characteristic changes in TDP-43 localisation, dynamics, and aggregation  
4 under physiological conditions and disease-associated stress were recapitulated in our CRISPR-  
5 tagged endogenous TDP-43 cell lines, we performed a series of imaging assays. TDP-43  
6 immunolabelling of *TARDBP-mAvicFP1/-mCherry* cells demonstrated clear co-localisation between  
7 the anti-TDP-43 immunostaining pattern, TDP-43-mAvicFP1, and TDP-43-mCherry fusion proteins  
8 (Figure 3A and B). Fluorescence recovery after photobleaching (FRAP) showed that diffusely  
9 distributed nuclear endogenous TDP-43-mAvicFP1 and TDP-43-mCherry exhibit similar nuclear  
10 localisation and overall mobility dynamics compared to exogenous over-expressed wild-type TDP-  
11 43-mGFP or TDP-43-mCherry (Figure 3C-L). No significant difference was found in the maximal  
12 recovery levels normalised to pre-bleaching intensity (0.74 and 0.83 for endogenous TDP-43-  
13 mAvicFP1 and over-expressed TDP-43-GFP, respectively [Figure 3I], or 0.76 and 0.80 for  
14 endogenous and over-expressed TDP-43-mCherry, respectively [Figure 3J]). Regarding recovery  
15 rate kinetics, there was no significant difference in time taken to reach half maximal recovery  
16 between endogenous and over-expressed fusion proteins (8.71 s and 9.81 s, respectively, for  
17 mAvicFP1 or GFP TDP-43 [Figure 3K]; 8.5 s and 11.49 s, respectively, for mCherry TDP-43 [Figure  
18 3L]). Area-under-the-curve (AUC) and mobility fraction (m.f.) analyses, which further indicate the  
19 overall proportion of highly mobile proteins within the nucleus, were slightly but insignificantly  
20 decreased for both endogenous fusion proteins relative to their over-expressed forms (AUC = 67.80  
21 and 82.61, m.f. = 44.61 and 58.81% respectively, for mAvicFP1 and GFP TDP-43 [Figure 3G]; AUC  
22 = 68.12 and 76.95, m.f. = 41.93 and 48.51% respectively, for mCherry TDP-43 [Figure 3H]).  
23 Therefore, CRISPR-tagged endogenous TDP-43 proteins demonstrate similar properties to  
24 commonly-studied over-expressed TDP-43 fusion proteins, thereby validating these cell lines for  
25 further studies of TDP-43 protein dynamics.

26



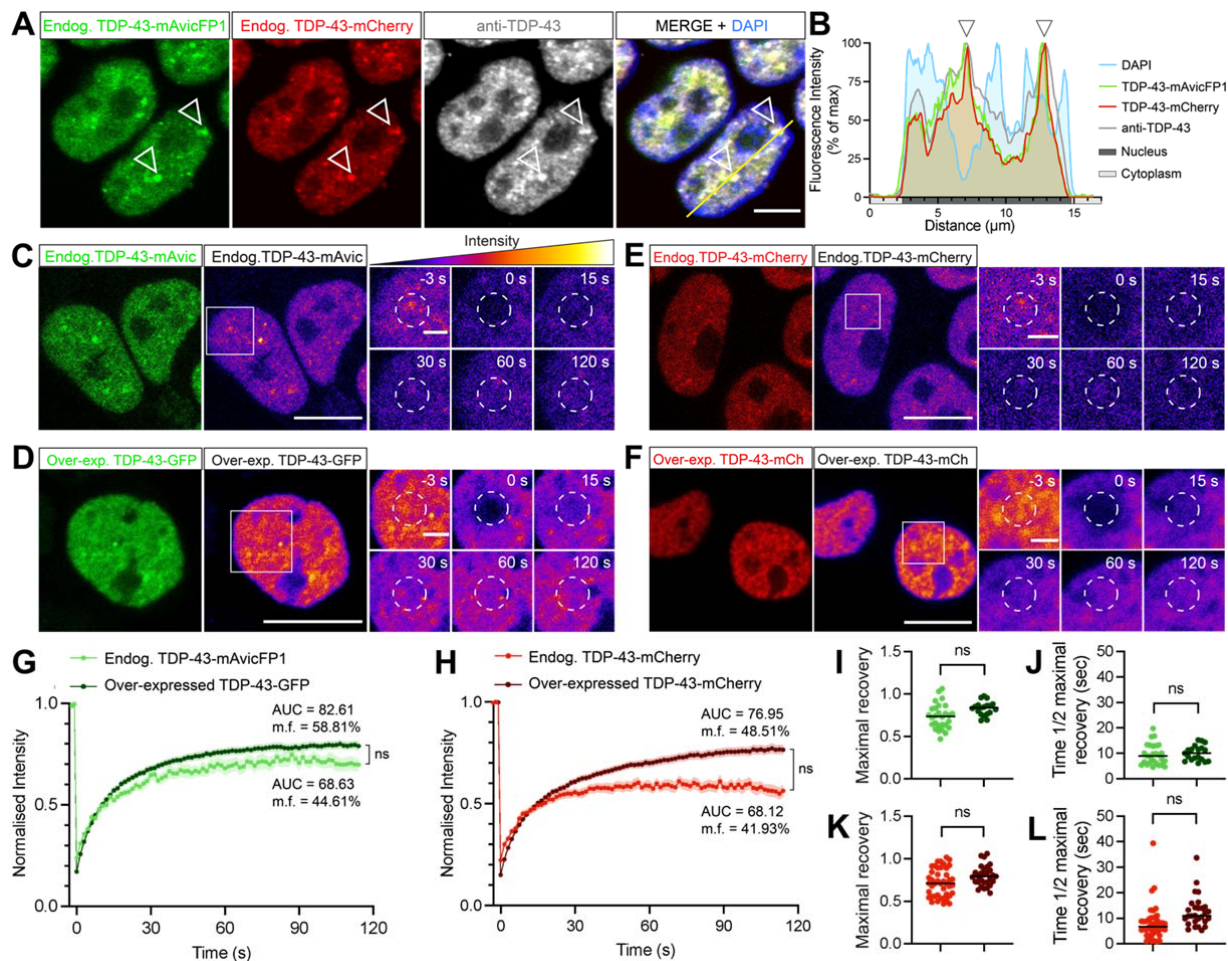

1  
2  
3 **Figure 3. CRISPR-tagged endogenous TDP-43-mAvcFP1/mCherry fusion proteins demonstrate**  
4 **nuclear localisation and high protein mobility under physiological conditions. (A)** CRISPR-tagged TDP-  
5 43-mAvcFP1 and TDP-43-mCherry proteins exhibit nuclear localisation and co-localise strongly with anti-  
6 TDP-43 labelled TDP-43, indicated by arrowheads. Scale bar = 5 $\mu\text{m}$ . **(B)** Intensity profile displaying spatial  
7 alignment of TDP-43-mAvcFP1, TDP-43-mCherry and anti-TDP-43 immunofluorescence signals within nuclei.  
8 **(C-F)** FRAP was performed to quantify the mobility of nuclear endogenous TDP-43 in *TARDBP-mAvcFP1*  
9 cells or *TARDBP-mCherry* cells. The two large left panels (scale bar = 10 $\mu\text{m}$ ) show initial snapshots of **(C)**  
10 endogenous TDP-43-mAvcFP1, **(D)** over-expressed TDP-43-GFP, **(E)** endogenous TDP-43-mCherry, and **(F)**  
11 over-expressed TDP-43-mCherry, depicted with the correct emission wavelength (green or red) on the left and  
12 pseudocoloured “fire” LUT to visualize the scale of intensity on the right. Image intensities were re-scaled  
13 under conditions to allow for side-by-side comparison of fluorescence recovery. Smaller panels display a  
14 zoomed-in view of the bleached region of interest outlined by white dashed circles, captured at -3, 0, 15, 30,  
15 60 and 120 s post-bleaching (scale bar = 2 $\mu\text{m}$ ). **(G, H)** Normalised intensity over time post-bleaching,  
16 with mobility fraction (m.f.) values and area-under-the-curve (AUC) averaged for each cell, which was used for  
17 statistical comparison. Data is the mean of  $n=3$  biologically independent repeats, each including at least 5 cells  
18 on average, and the shaded area denotes standard error about the mean. **(I, K)** Maximal fluorescence  
19 recovery at 120 s post-bleaching, for mAvcFP1/GFP and mCherry, respectively. **(J, L)** Time taken to recover  
20 to half of the maximal level, for mAvcFP1/GFP and mCherry, respectively. Black lines represent mean of  $n=3$   
21 independent repeats as above, with each dot representing individual FRAP recordings across multiple cells in  
22 each replicate. Data analysed using two-tailed t-tests where ns is not significant ( $p > 0.05$ ).

23  
24 Liquid-liquid phase separation (LLPS) is a key feature of physiological TDP-43 function, but aberrant  
25 or chronic self-assembly via LLPS may seed aggregation of TDP-43. As TDP-43 LLPS has  
26 commonly been studied using over-expression constructs, truncated mutants, optogenetic clustering  
27 methods, or recombinant proteins *in vitro*, we sought to characterise LLPS structures comprising  
28 endogenous native TDP-43 protein in live cells. As an essential RNA-binding protein, TDP-43 has  
29 previously been shown to be a major component of SGs that assemble under oxidative stress (Lee

1 et al., 2021; Mann et al., 2019; Ratti et al., 2020; Zhang et al., 2019). Indeed, fixed-cell  
2 immunostaining for the SG marker, G3BP1, in *TARDBP-mAvicFP1* cells under physiological  
3 conditions demonstrated absence of cytoplasmic SGs with diffusely distributed endogenous TDP-43  
4 in the nucleus (Figure 4A). As expected, treatment with the oxidative stressor, 50  $\mu$ M sodium  
5 arsenite, for 1 h induced formation of distinct rounded G3BP1-positive and endogenous TDP-43-  
6 positive puncta of ~2-4  $\mu$ m in diameter (Figure 4B). Live-cell imaging of vehicle-treated cells also  
7 revealed small nuclear physiological endogenous TDP-43 puncta, defined as rounded particles of  
8 0.5-2.5  $\mu$ m in diameter (Figure 4C). Arsenite-mediated oxidative stress increased the percentage of  
9 cells with nuclear endogenous TDP-43 puncta by approximately 20%, and the number of puncta per  
10 cell by 50% (Figure 4 D-H). However, arsenite-induced cytoplasmic endogenous TDP-43 SGs could  
11 not be detected under live-cell acquisition parameters.

12  
13 Interestingly, arsenite treatment in *TARDBP-mAvicFP1* cells also induced formation of assemblies  
14 reminiscent of the recently characterised 'TDP-43 anisosomes', spherical shell-like structures with a  
15 core void of TDP-43 (Figure 4I). Endogenous TDP-43 anisosomes formed in 10% of arsenite-treated  
16 cells, wherein most cells contained just one anisosome, compared to 0.5% of vehicle-treated cells  
17 exhibiting spontaneous anisosome formation (Figure 4E,F). Anisosomes were larger than puncta  
18 and treatment with sodium arsenite yielded anisosomes that were on average 2  $\mu$ m in diameter  
19 (Figure 4J). Endogenous TDP-43 anisosomes formed rapidly (within 15 min, Figure 4K) and  
20 remained stable throughout arsenite treatment (Supplementary Figure 4A). TDP-43 anisosome  
21 formation and stability are thought to critically require Hsp70 recruitment, however immunostaining  
22 only revealed endogenous Hsp70 surrounding the periphery, but not within the core, of endogenous  
23 TDP-43 anisosomes (Supplementary Figure 4B), as shown previously (Yu et al., 2021).

24  
25 Over-expression of wild-type TDP-43-GFP in parental HEK293 cells led to variable intensity levels  
26 and occasional mislocalisation or aggregation of TDP-43<sup>WT</sup>-GFP under basal conditions, while  
27 arsenite-mediated oxidative stress increased the brightness and number of TDP-43<sup>WT</sup>-GFP puncta  
28 per cell over time (Figure 4L, Supplementary Figure 4C). Notably, exogenous over-expressed TDP-  
29 43<sup>WT</sup>-GFP did not form anisosomes under arsenite treatment. This difference between endogenous  
30 and over-expressed TDP-43 self-assembly may highlight the dependency of TDP-43 self-assembly  
31 patterns on protein abundance. This suggests that the formation of stress-induced anisosomes and  
32 other dynamic structures composed of wild-type TDP-43 may be best studied in models that  
33 visualise physiological TDP-43.

34  
35 We next used FRAP to determine the relative mobility dynamics of the distinct nuclear assemblies of  
36 endogenous TDP-43, namely physiological puncta, arsenite-induced puncta, and arsenite-induced  
37 anisosomes (Figure 4M). Endogenous TDP-43 within each of these assemblies exhibited dynamic  
38 exchange and/or recruitment of TDP-43 molecules over time, showing no significant differences in  
39 area-under-the-curve, or mobility fraction analyses (Figure 4N), and comparable maximal  
40 fluorescence recovery levels to diffusely-distributed nuclear TDP-43 (Figure 4O). However,

1 endogenous TDP-43 anisosomes showed significantly decreased rate of recovery, measured as the  
2 time to reach half maximal intensity post-bleaching ( $t_{1/2} = 19.53$  s), compared to diffuse and  
3 physiological puncta of endogenous TDP-43 ( $t_{1/2} = 7.96$  s) (Figure 4P).

4

5 Together, these results demonstrate that CRISPR/Cas9-tagged endogenous TDP-43-mAvicFP1 and  
6 TDP-43-mCherry proteins exhibit characteristic TDP-43 localisation and mobility, however there  
7 were some key differences in the propensity for self-assembly under oxidative stress compared to  
8 over-expressed wild-type TDP-43. Notably, we showed that under oxidative stress, over-expressed  
9 TDP-43<sup>WT</sup>-GFP demonstrated increased nuclear aggregation compared to endogenous TDP-43-  
10 mAvicFP1, and did not form anisosomes which were observed in 10% of *TARDBP-mAvicFP1* cells.  
11 This indicates that over-expressed proteins may not always faithfully recapitulate self-association  
12 states of TDP-43, which may be influenced by protein concentration. Endogenous TDP-43  
13 anisosomes were dynamic, yet demonstrated a slower fluorescence recovery rate than diffuse or  
14 physiological puncta of endogenous TDP-43, indicating decreased rate of recruitment. Therefore,  
15 both cellular stress conditions and the distinct structures of TDP-43 assemblies affects the real-time  
16 formation and mobility dynamics of normal nuclear TDP-43.

17

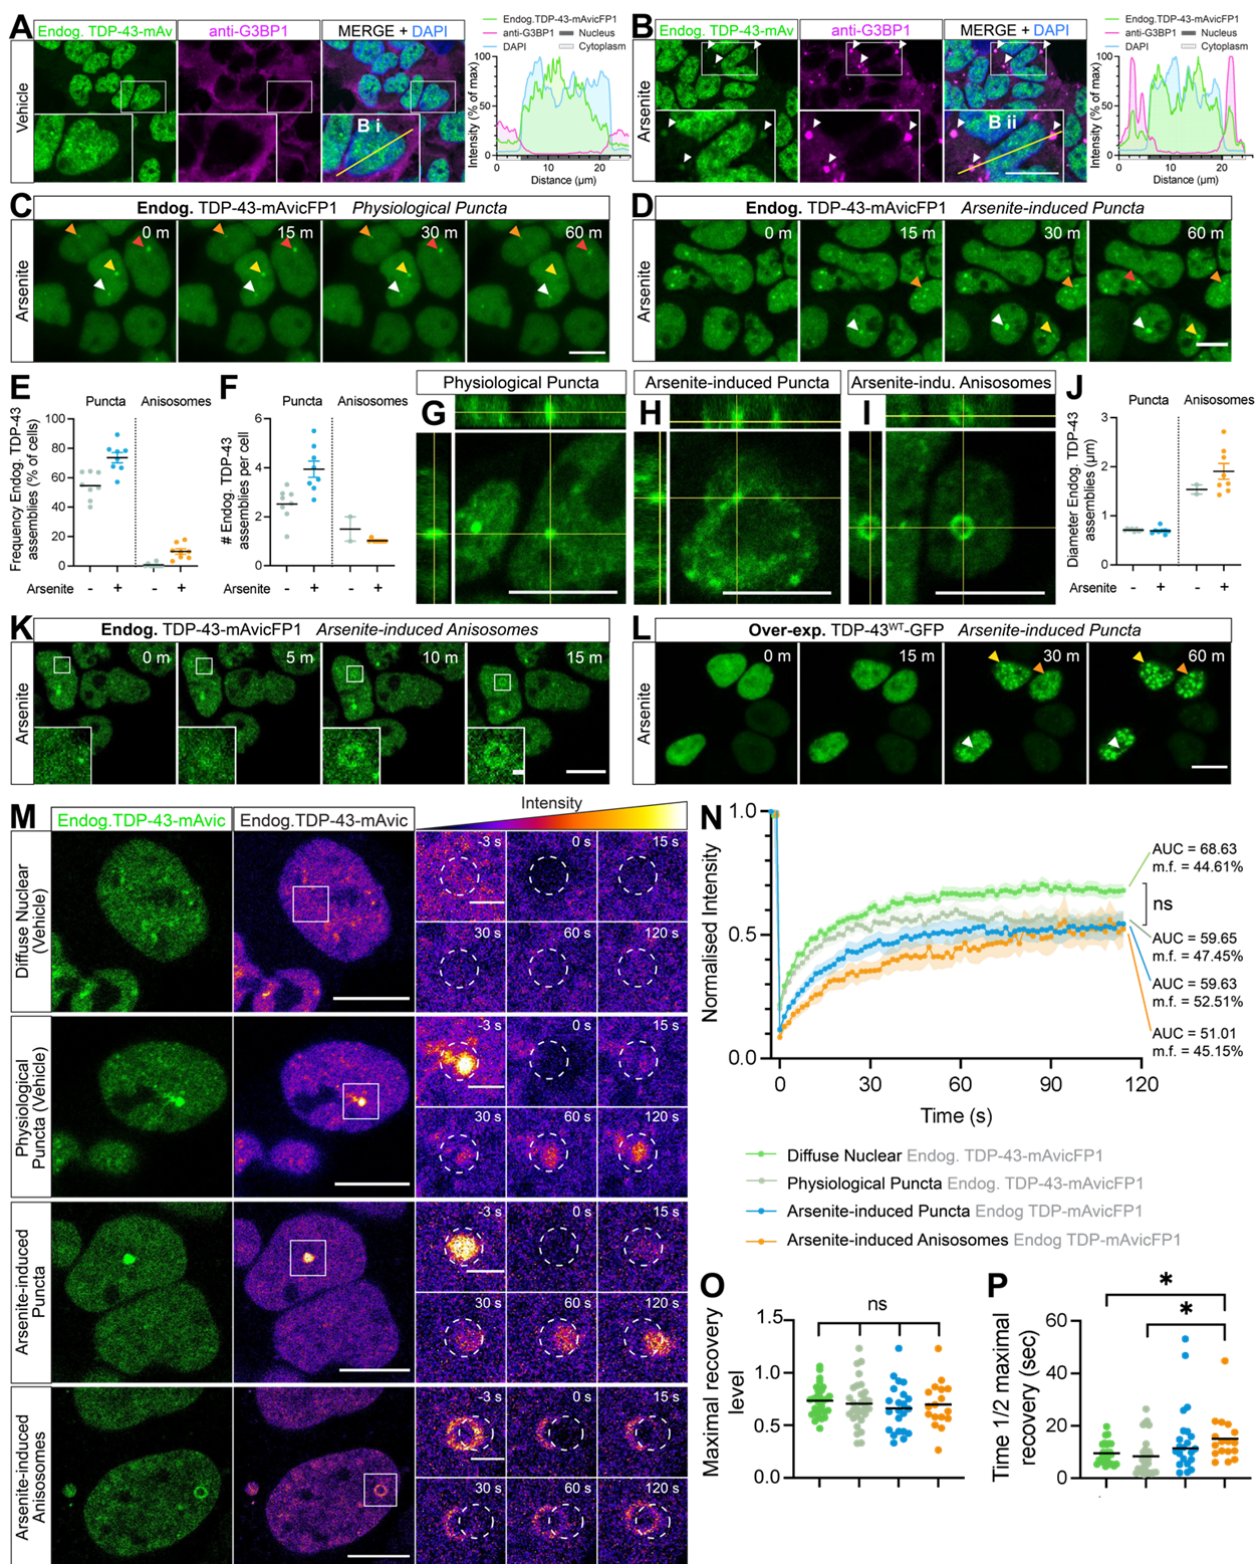

1  
2 **Figure 4. Endogenous CRISPR-tagged normal nuclear TDP-43 undergoes physiological or stress-**  
3 **induced self-assembly via liquid-liquid phase separation to form cytoplasmic stress granules or**  
4 **dynamic nuclear puncta and anisosomes in real-time. (A, B)** Representative confocal micrographs and  
5 and intensity profiles of anti-G3BP1 labelling and TDP-43-mAvicFP1 in HEK293: *TARDBP-mAvicFP1* cells treated  
6 with vehicle or 50  $\mu$ M sodium arsenite for 1 h. Inset zoomed view of cells measured for fluorescence intensity  
7 profiles; scale = 10  $\mu$ m. **(C)** Live-cell imaging displays formation of stable physiological puncta with 1 h vehicle  
8 treatment, or **(D)** increased formation of nuclear puncta induced by 50  $\mu$ M arsenite. **(E)** Frequency of cells with  
9 endogenous TDP-43-mAvicFP1 nuclear puncta and **(F)** number of puncta per cell. Data points represent the  
10 mean of all cells within an image, totalling 8 images per group. **(G)** 3-dimensional orthogonal projections of  
11 physiological nuclear puncta **(H)** arsenite-induced puncta, and **(I)** arsenite-induced anisosomes comprising  
12 endogenous TDP-43-mAvicFP1. **(J)** Diameter size in  $\mu$ m of puncta and anisosomes. **(K)** Live-cell imaging of

1 endogenous TDP-43-mAvicFP1 anisosome formation with 50  $\mu\text{m}$  arsenite treatment. **(L)** Live-cell imaging of  
2 parental HEK293 cells over-expressing TDP-43<sup>WT</sup>-GFP with 50  $\mu\text{m}$  arsenite treatment; scale large panels = 10  
3  $\mu\text{m}$ ; zoomed panels = 1  $\mu\text{m}$ . **(M)** FRAP quantification of endogenous TDP-43-mAvicFP1 mobility within distinct  
4 nuclear assemblies. Two large left panels depict endogenous TDP-43-mAvicFP1 signal with correct emission  
5 (green) on the left and pseudocoloured “fire” LUT to visualise intensity scale on the right; scale = 10  $\mu\text{m}$ .  
6 Image intensities re-scaled between conditions to allow for side-by-side comparison of fluorescence recovery.  
7 Smaller panels display zoomed view with photo-bleached ROI outlined by white dashed circles, captured at -3,  
8 0, 15, 30, 60 and 120 s post-bleaching; scale = 2  $\mu\text{m}$ . **(N)** FRAP analysis displays normalised intensity during  
9 recovery over 120 s, along with mobility fraction (m.f.) values and area-under-the-curve (AUC) averaged for  
10 each cell, which was used for statistical comparison. Coloured lines represent mean of  $n=3$  biologically  
11 independent repeats, each striving for at least 5 cells, with shaded areas denoting standard error about the  
12 mean. **(O)** Maximal fluorescence recovery at 120 s post-bleaching, and **(P)** time taken to recover to half of the  
13 maximal level for each of the TDP-43-mAvicFP1 assemblies. The same colour scheme as that of the intensity  
14 line graphs was used, with black lines representing the mean across  $n=3$  biologically independent repeats,  
15 and each dot denoting individual cells. All data analysed with one-way ANOVA multiple comparisons with  
16 Tukey’s post hoc test, relative to the ‘diffuse nuclear endogenous TDP-43-mAvicFP1’ control (\* =  $p < 0.05$ ).  
17

## 18 Pathological accumulation of RNA-binding-ablated or acetylation-mimic TDP-43 sequesters 19 and depletes free normal nuclear TDP-43 in a concentration-dependent manner

20 Another key feature of disease is the depletion of normal nuclear TDP-43, which is observed in cells  
21 that exhibit pathological aggregation, but can also independently mediate neurodegeneration. To  
22 determine whether the progressive accumulation of different pathological TDP-43 proteins causes  
23 loss of free nuclear TDP-43 in single cells, we over-expressed nuclear wild-type (WT), RNA-binding-  
24 ablated (4FL; F147L/F149L/F229L/F231L) or acetylation-mimic (2KQ; K145Q/K192Q) TDP-43  
25 mutants, as well as cytoplasmically-mislocalised variants of each mutant, harbouring disrupted  
26 nuclear localisation signals ( $\Delta\text{NLS}$ ; K82A/R83A/K84A), in HEK293T:*TARDBP-mCherry* cell lines  
27 (Figure 5A and B). In duplicate experiments, parental HEK293T cells lacking CRISPR-tagged  
28 endogenous TDP-43-mCherry transfected with TDP-43-GFP variants were used as imaging controls  
29 to ensure no cross-over of fluorescence emission and for setting intensity thresholds during  
30 quantitative image analysis (Supplementary Figure 5). Confocal imaging and CellProfiler image  
31 analysis demonstrated that over-expression of TDP-43-GFP variants led to slight, but not statistically  
32 significant, decreases in total nuclear endogenous TDP-43-mCherry signal (white arrowheads;  
33 Figure 5A-C), compared to GFP-transfected control cells. Auto-regulation of TDP-43 is a major  
34 contributor to the loss of normal nuclear TDP-43 levels observed in cells with accumulation of  
35 pathological TDP-43, by decreasing endogenous *TARDBP* expression (Ayala et al., 2011b;  
36 Hallegger et al., 2021; Koehler et al., 2022). We found no significant change in endogenous  
37 *TARDBP-mCherry* mRNA expression in bulk-cell qPCR analysis following introduction of these  
38 exogenous TDP-43-GFP variants, including RNA-binding-competent nuclear WT TDP-43-GFP  
39 (Supplementary Figure 6A). However, this result is likely due to inconsistent exogenous TDP-43-  
40 GFP over-expression and consequent sampling of many untransfected cells in our experiments  
41 (Supplementary Figure 6B,C).

42  
43 Despite no change in total levels, we observed that the distribution of endogenous TDP-43-mCherry  
44 was dramatically altered and co-localised with bright mutant TDP-43-GFP aggregates formed by  
45 each of the nuclear or cytoplasmic variants (yellow asterisks and intensity profiles; Figure 5A and B).  
46 This indicated sequestration, which was extremely pronounced in cells over-expressing nuclear

1 RNA-binding ablated (4FL) or acetylation-mimicking (2KQ) mutants. Sequestration with 4FL or 2KQ  
2 mutants correlated with a significant 50% decrease in levels of diffuse nuclear endogenous TDP-43  
3 (excluding areas occupied by aggregates; Figure 5D;  $p < 0.05$ ). We found a clear negative  
4 correlation between GFP and diffuse nuclear mCherry intensity in individual cells with all TDP-43-  
5 GFP variants tested (Supplementary Figure 6D). This indicates that increasing intracellular levels of  
6 exogenous TDP-43-GFP resulted in a depletion of diffuse endogenous normal nuclear TDP-43 in a  
7 concentration-dependent manner (Supplementary Figure 6D). We analysed individual inclusions or  
8 puncta and measured endogenous TDP-43 intensity within these aggregates (Supplementary Figure  
9 7). Combining the levels of 'sequestered' and 'diffuse' proportion of endogenous TDP-43  
10 demonstrated that total cellular abundance of endogenous TDP-43 was unaffected, and that this re-  
11 distribution into inclusions or puncta accounts for the depletion of free diffuse normal nuclear  
12 endogenous TDP-43 (Figure 5F). At the single-cell level, there was a positive correlation between  
13 intensity of inclusions or puncta formed from over-expressed TDP-43-GFP and endogenous TDP-  
14 43-mCherry intensity levels sequestered into these structures (Supplementary Figure 6E and F).  
15 This shows that endogenous TDP-43-mCherry is specifically sequestered into pathological TDP-43  
16 structures, and that nuclear RNA-binding-ablated or acetylation-mimicking TDP-43-GFP mutants  
17 exhibited dramatically increased tendencies to sequester endogenous TDP-43 (Supplementary  
18 Figure 6G and H), resulting in the greatest depletion of diffuse normal nuclear TDP-43.

19  
20 All TDP-43-GFP variants demonstrated variable tendencies for forming large inclusions (Figure 5G),  
21 and the number of inclusions per transfected cell (Figure 5I), which were slightly higher for  
22 cytoplasmic mutants. However, RNA-binding-ablation (4FL) or acetylation-mimic (2KQ) variants  
23 dramatically increased formation of smaller puncta in the nucleus, which was matched only by  
24  $\Delta$ NLS/4FL, but not  $\Delta$ NLS or  $\Delta$ NLS/2KQ mutants in the cytoplasm (Figure 5H,J). Area of inclusions  
25 was not significantly different between variants (Figure 5K), however 'puncta' formed by nuclear 4FL  
26 or 2KQ mutants demonstrated larger area compared to other variants (Figure 5L) and consistently  
27 resembled anisosomes (Supplementary Figure 6I). Our results support previous work (Yu et al.,  
28 2021), showing that nuclear RNA-binding-ablated and acetylation-mimicking TDP-43 form  
29 anisosomes, which we observed in 100% of transfected cells, each containing approximately 20  
30 anisosomes (Supplementary Figure 6J-L). Similarly, we performed Hsp70 immunostaining in these  
31 cells but were unable to verify its localisation within the core of acetylated TDP-43-GFP anisosomes  
32 that recruited endogenous TDP-43 (Supplementary Figure 6I). Inclusions and puncta sequestering  
33 endogenous TDP-43 were identified as those with TDP-43-mCherry signals above lower quartile  
34 intensity of nuclear endogenous TDP-43-mCherry in GFP-transfected control cells. Nearly all  
35 nuclear inclusions formed by WT, 4FL or 2KQ variants sequestered endogenous TDP-43-mCherry,  
36 whereas only  $35 \pm 0.1\%$  of cytoplasmic  $\Delta$ NLS inclusions recruited TDP-43-mCherry (Figure 5M).  
37 However, cytoplasmic  $\Delta$ NLS/4FL or  $\Delta$ NLS/2KQ variants exhibited  $88.47 \pm 2.31\%$  and  $77.52 \pm 4.49\%$ ,  
38 respectively, of inclusions sequestering endogenous TDP-43 (Figure 5M), indicating that disease-  
39 associated pathological changes increase the sequestration of normal nuclear TDP-43 to  
40 cytoplasmic inclusions. Finally, smaller WT puncta or anisosomes formed by 4FL and 2KQ mutants

1 in the nucleus almost always recruited endogenous TDP-43-mCherry (Figure 5N). In contrast,  
2 puncta in cells expressing cytoplasmic TDP-43-GFP mutants  $\Delta$ NLS ( $28.31\pm 11.54\%$ ),  $\Delta$ NLS/4FL  
3 ( $25.95\pm 1.29\%$ ), or  $\Delta$ NLS/2KQ ( $18.65\pm 2.82\%$ ) showed a significantly lower proportion of TDP-43-  
4 mCherry sequestration (Figure 5N).

5

6 These results show that nuclear RNA-binding-ablated or acetylation-mimicking mutant TDP-43  
7 proteins form an increased number and size of anisosomes compared to WT TDP-43-GFP puncta.  
8 Nuclear puncta or anisosomes formed from pathological TDP-43-GFP sequester endogenous TDP-  
9 43 in a concentration-dependent manner, which depletes diffuse nuclear endogenous TDP-43 seen  
10 earlier (Figure 5D, F; Supplementary Figure 5D). Additionally, we found that RNA-binding-ablated or  
11 acetylation-mimicking mutants in the cytoplasm led to significantly greater sequestration of  
12 endogenous TDP-43, compared to  $\Delta$ NLS alone. Together these findings suggest that changes in  
13 RNA-binding capacity and acetylation of TDP-43 that occurs in ALS and FTD, enhances the  
14 propensity for self-associated into puncta and depletes free nuclear TDP-43. Immunostaining for  
15 total TDP-43 also revealed that anti-TDP-43 encircled TDP-43-GFP aggregates but was unable to  
16 stain the core, while fluorescent signals from endogenous TDP-43-mCherry featured throughout  
17 these structures (Supplementary Figure 8), as shown previously (Yu et al., 2021). While anti-TDP-43  
18 antibodies may not penetrate inclusions, this provides evidence that free normal nuclear TDP-43 is  
19 not only sequestered to the surface, but likely 'co-aggregates' with over-expressed exogenous TDP-  
20 43-GFP proteins during inclusion formation. Importantly, this sequestration into large inclusions,  
21 puncta, or anisosomes may mark critical molecular events by which normal nuclear TDP-43  
22 becomes mislocalised, dysfunctional, and pathological in cells following initiation of TDP-43  
23 aggregation.

24

25

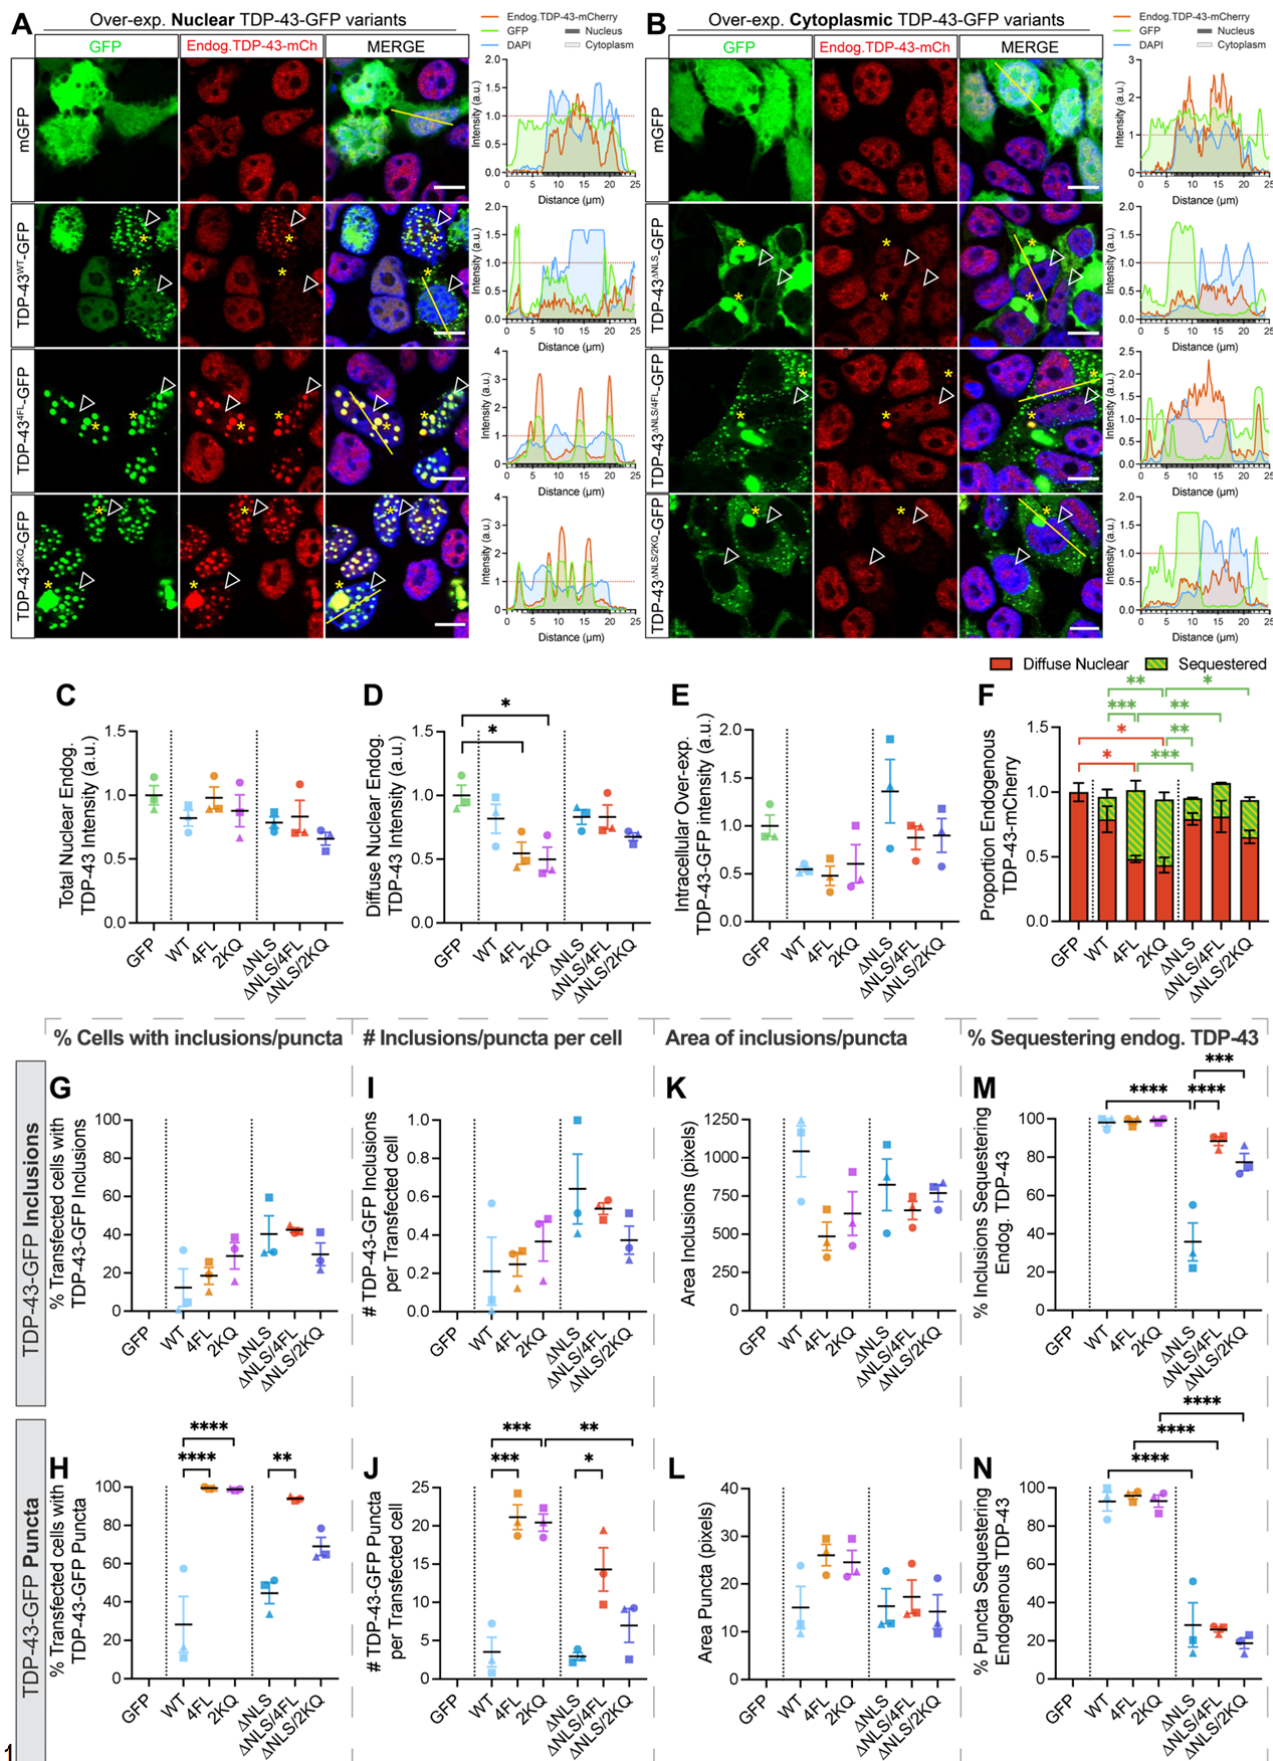

1 **Figure 5. Nuclear or cytoplasmic acetylation-mimicking TDP-43 decreases endogenous TDP-43 levels**  
 2 **and recruits endogenous TDP-43 to puncta and inclusions.** Representative confocal micrographs of  
 3 HEK293T: *TARDBP-mCherry* cells over-expressing (A) nuclear or (B) cytoplasmic TDP-43-GFP variants fixed  
 4 and imaged at 48 h post-transfection to observe changes in levels or localisation of endogenous TDP-43-  
 5



1 mCherry; scale = 10  $\mu\text{m}$ . Right-hand panels display relative fluorescence intensity profiles of example cells  
2 (sampling region marked by yellow line), and the red line denotes the mean level of each intensity  
3 measurement across GFP-transfected control cells, to which other intensities are normalised. **(C)** CellProfiler  
4 image segmentation analysis was used to quantify intensities of total nuclear or **(D)** diffuse nuclear  
5 endogenous TDP-43-mCherry proteins, and **(E)** intracellular levels of over-expressed TDP-43-GFP protein  
6 variants in transfected cells. Each point represents the mean relative fold change from GFP-transfected  
7 control cells, sampling cells from 8 regions-of-interest at 63x magnification, for each of  $n=3$  biologically  
8 independent repeats, denoted by different point shapes. **(F)** Stacked bar graph demonstrating the proportions  
9 of endogenous TDP-43 diffusely distributed in the nucleus (red) or sequestered into nuclear or cytoplasmic  
10 TDP-43-GFP aggregates (green). **(G-N)** CellProfiler image segmentation was used to quantify parameters of  
11 aggregates formed by over-expression of TDP-43-GFP variants. Inclusions were defined as bright speckles  
12 with minimum diameter of 20 pixels, and puncta with 3-20 pixel diameter, within transfected cells. **(G,H)**  
13 Proportion of transfected cells with inclusions or puncta. **(I,J)** Number of inclusions or puncta per transfected  
14 cell. **(K,L)** Area of inclusions or puncta. **(M,N)** Proportion of inclusions or puncta sequestering endogenous  
15 TDP-43, respectively. Inclusions or puncta sequestering endogenous TDP-43-mCherry defined as those with  
16 endogenous TDP-43-mCherry intensity above the lower quartile intensity of diffusely-distributed nuclear  
17 endogenous TDP-43-mCherry in GFP-transfected control cells. Cell numbers and replicates as per (C-E).  
18 Statistically significant differences between the means were analysed as one-way ANOVA multiple  
19 comparisons with Tukey's post hoc test (\* =  $p<0.05$ , \*\* =  $p<0.01$ , \*\*\* =  $p<0.001$ , \*\*\*\* =  $p<0.0001$ ).  
20  
21

## 22 Free normal nuclear TDP-43 is specifically sequestered into acetylation-mimicking TDP-43 23 inclusions, becoming insoluble and immobile

24 As acetylation, along with other PTMs, is a key feature of TDP-43 pathology in ALS and FTD, we  
25 next sought to determine whether sequestration of normal TDP-43 to acetyl-mimicking mutant TDP-  
26 43 structures altered its solubility or mobility, indicating dysfunction and pathological transition. We  
27 performed phospho-TDP-43(403/404) immunostaining on *TARDBP-mCherry* cells expressing  
28 nuclear or cytoplasmic acetylation-mimic TDP-43-GFP proteins to further characterise the  
29 sequestration of endogenous TDP-43 into puncta and inclusions. Confocal imaging demonstrates  
30 that a majority of large nuclear or cytoplasmic acetylation-mimicking mutant TDP-43 inclusions that  
31 sequester normal TDP-43-mCherry were highly phosphorylated (Figure 6A,B, white arrowheads).  
32 Smaller cytoplasmic puncta formed by acetylated TDP-43 showed less TDP-43-mCherry  
33 sequestration and were occasionally phosphorylated (Figure 6B). Nuclear anisosomes that readily  
34 recruited free normal nuclear TDP-43 were never phosphorylated (Figure 6A, yellow arrowheads).  
35 The tendency for large, phosphorylated acetylation-mimicking TDP-43 inclusions to recruit  
36 endogenous TDP-43 prompts investigation to determine whether this sequestration constitutes a  
37 pathological transition of normal TDP-43 protein, leading to insolubility and immobility.  
38

39 We therefore analysed the levels of detergent-soluble and -insoluble levels of normal endogenous  
40 TDP-43 in cells over-expressing these pathological TDP-43-GFP mutants. Over-expression of either  
41 nuclear or cytoplasmic acetylation-mimic TDP-43-GFP (Figure 6C,F) resulted in a significant 6-fold  
42 increase of insoluble endogenous TDP-43 levels, detected via the myc tag incorporated during  
43 CRISPR editing (Figure 6D,G). Soluble endogenous TDP-43-mCherry levels were not significantly  
44 altered (Figure 6E,H). These findings show that nuclear and cytoplasmic phosphorylated inclusions  
45 formed by acetylation-mimicking TDP-43 sequester, and render insoluble, normal TDP-43.  
46

47 We next investigated whether this sequestration alters the mobility dynamics of normal TDP-43-  
48 mCherry (Figure 6I). As expected, FRAP analysis revealed that the incorporation of endogenous

1 TDP-43 into acetylated cytoplasmic TDP-43 inclusions abolishes its mobility, in comparison to  
2 diffusely distributed nuclear TDP-43 (Figure 6J). Either complete or partial bleaching of endogenous  
3 TDP-43 within nuclear or cytoplasmic inclusions both showed minimal fluorescence recovery,  
4 indicating almost no dynamic exchange with surrounding cytoplasmic proteins, or within the  
5 inclusion itself, respectively. Specifically, endogenous TDP-43 sequestered into large cytoplasmic  
6 TDP-43<sup>ΔNLS/2KQ</sup>-GFP inclusions showed an AUC of 10.49 a.u. and m.f. of 7.19%, a maximal recovery  
7 of 12.63% (Figure 6L) and time to reach half maximal (t1/2) of 17.17 s (Figure 6M). In some cells,  
8 acetyl-mimicking TDP-43-GFP in the nucleus formed large inclusions that recruited endogenous  
9 TDP-43-mCherry, which also showed severe mobility impairment (Figure 6K), demonstrated by AUC  
10 of 12.24 a.u., m.f. of 12.49, and significant decreases in maximal recovery of 14.70% (Figure 6N),  
11 and t1/2 of 26.18 s (Figure 6O). In contrast, endogenous TDP-43-mCherry incorporated more  
12 frequently into nuclear TDP-43<sup>2KQ</sup>-mGFP anisosomes and retained high mobility and rapid rate of  
13 recruitment (Figure 6K), with AUC of 59.25 a.u., m.f. of 51.90%, maximal recovery of 37% (Figure  
14 6L) and t1/2 of 6.30 s (Figure 6M). Dynamic properties of endogenous TDP-43 in anisosomes did  
15 not greatly differ overall from diffusely distributed endogenous TDP-43 in untransfected cells. This  
16 was likely due to the high concentration of nuclear acetylation-mimicking TDP-43 which formed  
17 anisosomes that readily recruited endogenous TDP-43. We note that the variability through time and  
18 decline following peak fluorescence recovery for acetylated TDP-43 anisosomes (Figure 6K) is likely  
19 due to movement of these structures within the nucleus partially out of the FRAP region-of-interest.  
20 Together, these findings suggest that endogenous TDP-43 is specifically sequestered into a variety  
21 of pathological TDP-43 structures to significantly alter the solubility and mobility dynamics of  
22 endogenous TDP-43. Endogenous TDP-43 incorporated into large, phosphorylated nuclear or  
23 cytoplasmic acetyl-mimicking TDP-43 inclusions correlated strongly with decreased solubility, along  
24 with a dramatic loss of mobility, while endogenous TDP-43 within anisosomes comprised of acetyl-  
25 mimicking TDP-43 remained highly mobile.

26  
27

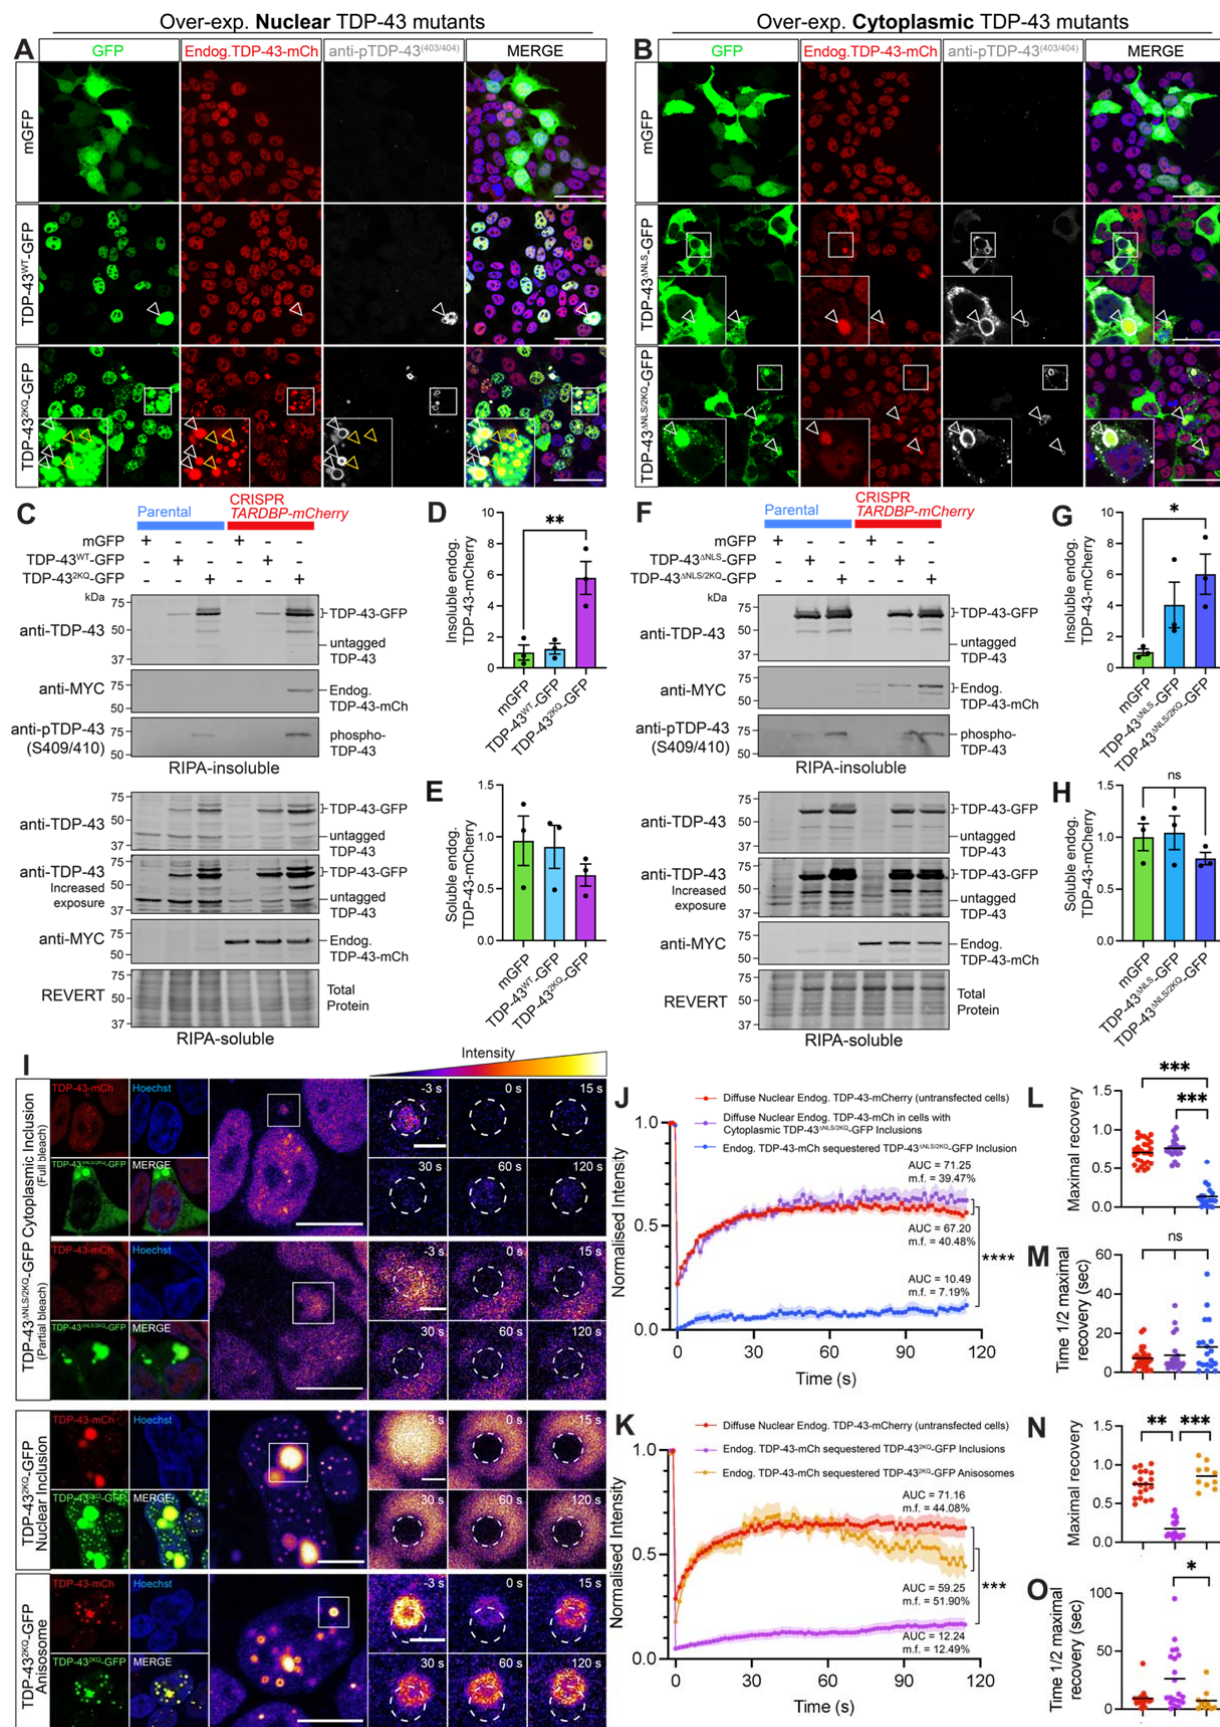

1  
2 **Figure 6. Sequestered endogenous TDP-43 becomes insoluble and immobile in nuclear and**  
3 **cytoplasmic inclusions, however retains high protein mobility when recruited to nuclear**  
4 **anisosomes. (A)** Representative confocal micrographs of CRISPR *TARDBP-mCherry* cells expressing  
5 nuclear TDP-43<sup>WT</sup>-GFP, acetylation-mimic TDP-43<sup>2KQ</sup>-GFP, or mGFP control. **(B)** Confocal micrographs  
6 of cytoplasmic TDP-43<sup>ANLS</sup>-GFP, acetylation-mimic TDP-43<sup>ANLS/2KQ</sup>-GFP, or mGFP control, 48h post-

1 transfection. White arrowheads indicate inclusions comprising endogenous over-expressed and  
2 phosphorylated TDP-43. Yellow arrowheads indicate TDP-43 anisosomes which lacked phosphorylated  
3 TDP-43. **(C)** Immunoblotting of CRISPR *TARDBP-mCherry* cells expressing nuclear or **(F)** cytoplasmic  
4 mutants, demonstrate changes in endogenous TDP-43-mCherry levels within **(D,G)** RIPA-insoluble and  
5 **(E,H)** -soluble protein fractions, respectively, quantified by densitometry analysis. **(I)** FRAP was used to  
6 quantify the mobility of endogenous TDP-43-mCherry proteins recruited to distinct nuclear or cytoplasmic  
7 structures formed by the over-expression of acetylation-mimic TDP-43-GFP mutants. Scale bars on left-  
8 hand panels = 10  $\mu\text{m}$ ; zoomed right-hand panels = 2  $\mu\text{m}$ . Pseudocolouring demonstrates changes in  
9 endogenous TDP-43-mCherry intensity, which was quantified within the bleaching region-of-interest  
10 (white dotted circle) for 120s post-bleaching. FRAP analysis of the normalised intensity during the  
11 recovery period for cells expressing **(J)** cytoplasmic or **(K)** nuclear acetylation-mimic mutant TDP-43-  
12 GFP, along with mobility fraction (m.f.) values and area-under-the-curve (AUC) averaged for each cell,  
13 which was used for statistical comparison. **(L,N)** Maximal fluorescence intensity observed at the final  
14 time-point (120s), and **(M,O)** time taken to recover to half of the maximal fluorescence level for nuclear  
15 and cytoplasmic TDP-43 mutants respectively. Same colour scheme as the intensity line graphs, with  
16 each point representing a single cell value, and the black line representing the mean across  $n=3$   
17 biologically independent repeats. Statistically significant differences between the means were analysed  
18 using one-way ANOVA multiple comparisons with Tukey's post hoc test (\* =  $p < 0.05$ ; \*\* =  $p < 0.01$ ).  
19

20

## 21 Discussion

22 It has remained unclear whether the accumulation of pathological TDP-43 proteins in ALS and FTD  
23 can directly divert normal TDP-43 away from its functional pool, to contribute to TDP-43 nuclear  
24 depletion and loss-of-function. Here, we developed novel cellular tools to study changes in normal  
25 nuclear TDP-43 abundance, localisation, self-assembly, inclusion formation, and mobility dynamics,  
26 under disease-mimicking conditions in real-time. Notably, we found that introduction of RNA-binding-  
27 deficient or acetyl-mimicking TDP-43 in either the nucleus or cytoplasm progressively decreases  
28 free nuclear TDP-43 abundance in a concentration-dependent manner. Endogenous TDP-43 was  
29 specifically sequestered into large cytoplasmic or nuclear inclusions formed by acetylation-  
30 mimicking TDP-43 variants, becoming insoluble and immobile. However, nuclear acetylation-  
31 mimicking TDP-43 also spontaneously formed TDP-43 anisosomes (Yu et al., 2021), which readily  
32 sequestered over half of total endogenous TDP-43 levels, but remained soluble and mobile.  
33 Endogenous wild-type TDP-43 also formed diverse highly dynamic biomolecular condensates via  
34 LLPS under various conditions. Indeed, arsenite-mediated oxidative stress increased the formation  
35 of nuclear liquid-like droplet structures with similar mobility dynamics to physiological puncta  
36 observed in unstressed cells. We also found that oxidative stress also induced LLPS formation of  
37 endogenous TDP-43 anisosomes in the nucleus, which notably were not formed by over-expressed  
38 wild-type TDP-43. These findings indicate that RNA-binding-deficient and acetylated TDP-43  
39 proteins, or disease-associated oxidative stress, drive recruitment of normal nuclear TDP-43 to  
40 insoluble inclusions or other condensed assemblies in a compartment-specific manner. This  
41 mechanism of pathological sequestration likely decreases the availability of functional nuclear TDP-  
42 43, which may critically exacerbate TDP-43 dysfunction in ALS and FTD.

43

44 A loss of free nuclear TDP-43 in disease may be triggered by cellular stressors that induce nuclear-  
45 to-cytoplasmic redistribution or phase transitions of endogenous TDP-43 into condensed  
46 assemblies. Phase-separated TDP-43 proteins comprising stress-induced liquid droplets, SGs, and

1 anisosomes likely remain soluble and dynamic, however confinement within these reversible  
2 structures may alter physiological TDP-43-RNA or -protein interactions (Lee et al., 2022; Yu et al.,  
3 2021). Furthermore, chronic induction, abnormal assembly, or aberrant phase transitions of TDP-43  
4 condensates may seed intranuclear or cytoplasmic aggregation, as observed in degenerating  
5 neurons (Chen and Cohen, 2019; Gasset-Rosa et al., 2019; Li et al., 2013; Mann et al., 2019; Yu et  
6 al., 2021; Zhang et al., 2019). Critically, TDP-43 LLPS has largely been studied by over-expressing  
7 TDP-43 constructs with mutations, truncations, or optogenetic clustering tags that promote self-  
8 assembly. Alternatively, in this study we sought to characterise these LLPS-related structures  
9 formed by endogenous TDP-43, to more closely study the physiological context. We consistently  
10 observed distinct liquid-like ‘nuclear bodies’ or ‘droplets’ under physiological conditions, but found  
11 that arsenite-mediated oxidative stress increased their formation, and also induced cytoplasmic  
12 G3BP1-positive TDP-43 SGs, aligning with previous studies of exogenous TDP-43 LLPS (Gu et al.,  
13 2021; Wang et al., 2020). Notably, we found that oxidative stress increased the formation of rare  
14 endogenous TDP-43 anisosomes, of which spontaneous formation has been previously reported  
15 upon over-expression of RNA-binding-ablated or acetylation-mimicking TDP-43 variants (Yu et al.,  
16 2021). Combined treatment with histone deacetylase and proteasome inhibition has also been  
17 shown to induce endogenous TDP-43 anisosome formation in rats (Yu et al., 2021), suggesting that  
18 diverse cellular stressors can stimulate TDP-43-containing anisosome formation. We found that  
19 endogenous TDP-43 anisosomes form rapidly and have high mobility in live cells, and that TDP-43  
20 anisosome formation can be induced by oxidative stress, without requiring RNA-binding mutations  
21 or proteolytic stress. We speculate that cellular stress alters TDP-43-RNA interactions, leading to  
22 LLPS and dynamic self-assembly into RNA-deficient anisosomes, to deplete the free nuclear pool of  
23 functional TDP-43 (Cohen et al., 2012; Markmiller et al., 2021). It remains unclear whether other  
24 cellular stressors trigger endogenous TDP-43 anisosome formation, and whether the assembly of  
25 RNA-binding-competent TDP-43 into anisosomes impacts RNA-regulatory functions.

26  
27 Accumulation of pathological TDP-43 itself likely drives nuclear TDP-43 depletion by decreasing  
28 endogenous TDP-43 expression via auto-regulation (Ayala et al., 2011b; Hallegger et al., 2021;  
29 Koehler et al., 2022), or inducing mislocalisation by disrupting processes such as nucleocytoplasmic  
30 transport (Chou et al., 2018). However, potentially independent of these mechanisms, we found  
31 striking changes in endogenous TDP-43 distribution within cells with high abundance and  
32 aggregation of exogenous TDP-43-GFP. Notably, endogenous TDP-43-mCherry was sequestered  
33 into inclusions or puncta formed by pathological TDP-43-GFP variants, suggesting that a self-  
34 perpetuating cycle of pathological conversion may drive TDP-43 dysfunction in disease separately  
35 from or in addition to RNA-mediated auto-regulatory perturbations. Indeed, single-cell analysis  
36 revealed that nuclear RNA-binding-ablated (4FL) or acetylation-mimicking (2KQ) variants in  
37 particular sequestered a large proportion of endogenous TDP-43 into anisosomes, in a  
38 concentration-dependent manner. These findings indicate that as pathological TDP-43 accumulates  
39 over time, more and more normal TDP-43 may be diverted from normal nuclear function. In the  
40 cytoplasm, we similar found that the addition of pathology-mimicking 4FL or 2KQ mutations

1 increased inclusion and puncta formation over and above the  $\Delta$ NLS-only variant, however with only  
2 occasional recruitment of endogenous TDP-43, indicating compartment-specific tendencies for  
3 sequestration. While over-expression of TDP-43-GFP variants did not significantly alter total  
4 endogenous TDP-43 levels in this cell system, we showed that the dramatic redistribution into  
5 mutant inclusions, anisosomes, or puncta completely accounted for the loss of diffuse nuclear  
6 endogenous TDP-43. Our study therefore highlights that concentration-dependent sequestration of  
7 normal TDP-43 to pathological structures is likely a crucial concurrent process driving nuclear  
8 depletion of TDP-43 in ALS and FTD. Such sequestration, or 'co-aggregation', of over-expressed  
9 WT TDP-43 has been demonstrated upon introduction of disordered or mislocalised TDP-43  
10 proteins, with scarce evidence of endogenous human TDP-43 being sequestered in cell lines (Che  
11 et al., 2015; Gasset-Rosa et al., 2019; Winton et al., 2008; Zhang et al., 2013). Crucially, our  
12 unbiased quantitative image analysis demonstrated direct correlations between mutant TDP-43  
13 aggregation and the sequestration and depletion of free normal nuclear endogenous TDP-43, which  
14 was amplified by acetylated or RNA-binding-ablated TDP-43 mutants. While previous studies  
15 indicate that loss of RNA-binding promotes aberrant TDP-43 self-assembly and aggregation (Pérez-  
16 Berlanga et al., 2022), others suggest that TDP-43-RNA interactions mediate such sequestration, as  
17 RNA-binding ablated 4FL mutants were shown to not co-precipitate with endogenous TDP-43 (Che  
18 et al., 2015; Jiang et al., 2022). However, our results indicate that RNA-binding function is not  
19 necessary for sequestration of normal TDP-43. It is unclear from our study whether nuclear  
20 acetylation-mimicking TDP-43 retains RNA-binding capacity, or whether nuclear RNA abundance  
21 influences the formation of these TDP-43 assemblies. Therefore, the role of RNA-binding capacity in  
22 aggregation and endogenous TDP-43 sequestration requires further investigation, with additional  
23 mechanisms likely involved.

24  
25 Since we found that pathological TDP-43 could recruit normal nuclear TDP-43 to large inclusions,  
26 puncta or anisosomes in live cells, we also sought to determine whether this sequestration caused a  
27 transition to a pathological state. Inclusions formed by over-expressed acetyl-mimic TDP-43 that  
28 contained endogenous TDP-43 were often phosphorylated, reminiscent of end-stage disease  
29 pathology (Brettschneider et al., 2013), which may be promoted by acetylation (Wang et al., 2017).  
30 Furthermore, expression of acetylation-mimicking TDP-43 increased the levels of insoluble  
31 endogenous TDP-43 and phosphorylated TDP-43, concurrent with a slight decrease in soluble  
32 endogenous TDP-43. Importantly, sequestration of normal TDP-43 to nuclear or cytoplasmic  
33 inclusions led to insolubility and loss of mobility, likely indicating irreversible pathological transitions  
34 and loss-of-function, despite no change in total endogenous TDP-43 levels. Previous work has  
35 demonstrated co-precipitation of endogenous TDP-43 with mutant TDP-43 C-terminal fragments  
36 (Che et al., 2015), with others showing that over-expression of cytoplasmic  $\Delta$ NLS mutant TDP-43  
37 increases insoluble levels of endogenous TDP-43 (Winton et al., 2008). We are first to report  
38 sequestration of endogenous normal nuclear TDP-43 to various RNA-deficient inclusions,  
39 anisosomes, or puncta in either the nucleus or cytoplasm of live cells, and show that this recruitment

1 alters dynamic properties of endogenous TDP-43 to conform to exogenous mutant TDP-43 proteins  
2 that rapidly form these structures.

3

4 While more dramatic sequestration was caused by acetylated TDP-43 anisosomes, the  
5 pathophysiological implications remain unclear. Normal TDP-43 within anisosomes retained liquid-  
6 like properties and dynamic exchange with the free nuclear pool of TDP-43, corresponding with high  
7 mobility of over-expressed TDP-43<sup>2KQ</sup>-mClover anisosomes previously characterised (Yu et al.,  
8 2021). However, it is unknown whether normal TDP-43 recruited to anisosomes can interact with  
9 RNA, whether acetylated TDP-43 anisosomes inhibit or seed TDP-43 aggregation, and whether  
10 anisosomes form in human ALS and FTD (Yu et al., 2021). In either case, it is likely that  
11 sequestration constitutes a significant disruption of normal nuclear TDP-43 localisation, availability,  
12 and physiological interactions, contribute significantly to loss-of-function mechanisms of  
13 neurodegeneration, independently of changes to overall levels of normal nuclear TDP-43.  
14 Combined, these findings indicate that TDP-43 acetylation not only increases aggregation  
15 propensity, but also drives sequestration and pathological transitions of normal TDP-43, to  
16 potentiate disease-associated TDP-43 nuclear depletion, dysfunction, and pathology formation in  
17 ALS and FTD.

18

19 Studying endogenous TDP-43 protein over time is advantageous for elucidating disease-relevant  
20 mechanisms driving depletion and aggregation of the native TDP-43 protein, which becomes  
21 pathological in almost all cases of ALS and half of FTD (Ling et al., 2013). Our CRISPR-tagging  
22 approach allows for live-cell visualisation of endogenous TDP-43 in real-time, overcoming limitations  
23 of over-expression studies, end-point analyses and traditional staining techniques, to reveal  
24 assembly and composition of complex TDP-43 structures. CRISPR/Cas9-mediated fluorescent  
25 tagging of endogenous *TARDBP* has been reported in HEK293T cells for live-cell imaging (Jiang et  
26 al., 2022), in human neuroblastoma cells for FRAP (Gasset-Rosa et al., 2019) or in iPSCs for real-  
27 time quantification of nuclear endogenous TDP-43 (Chua et al., 2022; Gasset-Rosa et al., 2019;  
28 Jiang et al., 2022). Our unique CRISPR method, whereby one multiplexed editing reaction mediated  
29 insertion of two different fluorescent tags across different *TARDBP* alleles, demonstrates potential  
30 for differential fluorescence tagging of multiple distinct endogenous proteins for concurrent  
31 intracellular analysis. Recently, CRISPR-tagged endogenous myc-TDP-43 zebrafish models have  
32 been developed (Petel Légaré et al., 2022), supporting feasibility of fluorescently-tagged  
33 endogenous TDP-43 *in vivo* models. To our knowledge, this is the first endogenous-tagging  
34 application of mAvicFP1 (Lambert et al., 2020), which favourably exhibits high fluorescence intensity  
35 and photostability, and is amenable to single-molecule super-resolution microscopy (Gavrikov et al.,  
36 2020). Future directions in the use of our *TARDBP-mAvicFP1-mCherry* cell models include  
37 CRISPR-screening applications, live-cell single-molecule imaging or specific mutations of  
38 endogenous TDP-43. Finally, as we characterised dynamic TDP-43 structures (e.g. anisosomes)  
39 that were not formed by over-expressed TDP-43, it will be interesting to see whether novel dynamic  
40 TDP-43 assemblies could be discovered with high-resolution real-time imaging.

1

## 2 Conclusions

3 To interrogate molecular mechanisms by which TDP-43 protein becomes mislocalised and  
4 aggregated in disease, this study sought to investigate whether disease-associated stressors or  
5 pathology-mimicking TDP-43 variants alter endogenous TDP-43 abundance, localisation, self-  
6 assembly, aggregation, and mobility dynamics over time. We found that oxidative stress induces  
7 dynamic self-assembly of endogenous TDP-43 into ‘anisosomes’. Notably, we demonstrated that  
8 accumulation and aggregation of RNA-binding-ablated or acetylation-mimicking TDP-43 drives  
9 nuclear depletion of normal TDP-43, via concentration-dependent sequestration into inclusions,  
10 puncta or anisosomes. This specific sequestration into large, phosphorylated nuclear or cytoplasmic  
11 inclusions formed by pathological TDP-43 led to insolubility and immobility of normal TDP-43,  
12 indicating irreversible pathological transition. The most dramatic sequestration was caused through  
13 formation of nuclear anisosomes comprised of acetylation-mimicking TDP-43, although,  
14 interestingly, endogenous TDP-43 recruited to these dynamic structures remained highly mobile.  
15 Our results suggest that changes in localisation and availability of TDP-43 via sequestration into  
16 either disease-reminiscent inclusions or dynamic phase-separated structures may drive TDP-43  
17 dysfunction and perpetuate TDP-43 aggregation in ALS and FTD.

18

19



## 1 Materials and Methods

2 Chemicals were sourced from Sigma unless otherwise stated.

3

### 4 CRISPR/Cas9-mediated fluorescent protein knock-in to endogenous TARDBP genomic 5 locus

6 CRISPR/Cas9 gene-editing was used to generate endogenous TDP-43-tagged HEK293T cell lines  
7 with the insertion of fluorescent proteins, mAvicFP1 and mCherry, at the *TARDBP* C-terminus. The  
8 coding sequence for mAvicFP1, a monomeric, bright and photostable green fluorescent protein  
9 (Lambert et al., 2020), or the red fluorescent protein mCherry, were integrated immediately  
10 upstream of the exon 6 STOP codon, with a dual DYK- and Myc-tag linker sequence (Figure 1A-D).  
11 Gene insertion was mediated by homologous recombination of the PCR amplicon DNA donor  
12 template, which contained the fluorescent tag insertion sequence flanked by proximal and recessed  
13 homology arms of 50 and 56bp, respectively.

14

### 15 Single guide RNA and donor template primer design

16 sgRNA oligonucleotides and dsDNA donor templates for mAvicFP1/mCherry insertion were  
17 designed using the program *Benchling* and synthesised by *GenScript*. The sgRNA sequence (5'-  
18 GCTGGGGAATGTAGACAGTG-3') was designed to anneal to the *TARDBP* C-terminus and direct  
19 Cas9-mediated double-stranded break (DSB) 3 base-pairs (bp) upstream of the PAM site. Donor  
20 templates featured the insertion sequences of *mAvicFP1* or *mCherry*, preceded by a mutation of the  
21 PAM site (GGG>GGA) to prevent future Cas9-DSBs after successful gene-editing, and followed by  
22 FLAG-myc linkers to separate fluorescent protein tags from TDP-43 to ensure normal folding.  
23 Insertion sequences were flanked by 50 bp recessed or 56 bp proximal homology arms (Has) that  
24 were complementary to the endogenous *TARDBP* C-terminal sequence, to specifically direct  
25 insertion 6 bp upstream of the DSB. The donor templates were designed such that *FLAG* and *myc*  
26 sequences comprised the linker sequence between *TARDBP* and the fluorescent protein for  
27 downstream analysis of the edited protein with FLAG or myc antibodies.

28

### 29 PCR amplification of donor DNA templates for homology-directed repair

30 Donor templates for homology-directed repair were produced as linear DNA fragments from PCR  
31 amplification, as supplying PCR amplicons of just the insertion sequence produces greater editing  
32 efficiency compared to circular DNA constructs, and generates a higher concentration of DNA  
33 template (Paix et al., 2017). Donor template PCR products were purified using the QIAquick PCR  
34 Purification kit (QIAGEN, 28104), eluted in 15  $\mu$ L to maximise DNA concentration. The expected  
35 DNA band size of these amplicons (mAvicFP1 877 bp, mCherry 871 bp) was confirmed by analysing  
36 dsDNA donor templates on a 1% (w/v) agarose gel at 85 V for 1 h.

37

## 1 RNP complex assembly & electroporation delivery

2 Functional sgRNAs were formed by hybridisation of crRNA and tracrRNA (5'-  
3 AGCAUAGCAAGUUAAAUAAGGCUAGUCCGUUAUCAACUUGAAAAAGUGGCACCGAGUCGGU  
4 GCUUU-3'), whereby lyophilised crRNA and tracrRNA oligonucleotides were each reconstituted to  
5 100  $\mu$ M in sterile Tris-EDTA, and then combined in equimolar ratio to a final concentration of 40  $\mu$ M,  
6 diluted with duplex buffer (100 mM Potassium Acetate, 30 mM HEPES, pH 7.5). This duplex was  
7 heated at 95°C for 5 min and cooled at room temperature for 2 h, then diluted to 10  $\mu$ M in Tris-  
8 EDTA. RNP complexes were created by mixing 1.625  $\mu$ L cr:tracrRNA duplex (10  $\mu$ M) with 2.6  $\mu$ L  
9 purified NLS-Cas9-NLS protein (6.25  $\mu$ M) gently by pipetting, and incubating for 10-60 min.

10

11 300,000 HEK293 cells were aliquoted for each electroporation condition (DNA-free negative control,  
12 *mAvicFP1/mCherry* PCR-amplicon donor templates and pEGFP-N1 positive control). The RNP  
13 complex and donor DNA was delivered to the cells by electroporation using the Neon Transfection  
14 System 100  $\mu$ L kit (ThermoFisher, MPK10025) with Electrolytic Buffer-E2. Cells were resuspended  
15 in Buffer-R and transferred to the corresponding RNP complex tubes. 2.6  $\mu$ g of each dsDNA donor  
16 template was used. HEK293 cells/RNP complexes/donor templates were mixed and aspirated into a  
17 100  $\mu$ L Neon tip and electroporated with 1200 V, 2 pulses, 30 ms pulse width. The pipette was  
18 immediately removed from the device and cells transferred to a 12-well plate prepared with 1 mL  
19 warm media, and incubated for 3 days.

20

## 21 FACS isolation of successfully edited cells and selection of monoclonal cell lines

22 CRISPR/Cas9-edited cells were sorted using the BD Influx FACS with 488 nm and 561 nm lasers  
23 for excitation of *mAvicFP1* and *mCherry*, respectively. Quadrant gating defined cell populations  
24 that were *mAvicFP1*-positive, *mCherry*-positive, and 'dual-tagged' *mAvicFP1*-positive/*mCherry*-  
25 positive, which were seeded as single cells into 96-well plates. Single cells were allowed to grow  
26 into monoclonal colonies and scanned for *mAvicFP1* and *mCherry* fluorescence intensity using high-  
27 content microscopy, which distinguished low-, medium-, and high-intensity TDP-43-tagged cell lines.  
28 High-intensity cell lines *TARDBP-mAvicFP1(H8)*, *TARDBP-mCherry(B8)*, and *TARDBP-mAv/-*  
29 *mCh(C4)* were utilised for subsequent experiments throughout this study.

30

## 31 Sanger sequencing

32 Genomic DNA was extracted from approximately 1,000,000 cells of the CRISPR-edited *TARDBP-*  
33 *mAvicFP1(H8)*, *TARDBP-mCherry(B8)*, or *TARDBP-mAv/-mCh(C4)* HEK293 lines with a Bioline  
34 Isolate II Genomic DNA Kit [BIO-52066]. For each cell line, a ~900 bp 'genotyping zone', comprising  
35 the C-terminal *TARDBP* fluorescent tag insertion site was amplified by PCR, with specific primers  
36 annealing to the upstream *TARDBP* exon 6 sequence and *mAvicFP1* or *mCherry* sequence. PCR  
37 products were analysed by DNA electrophoresis on a 1% agarose gel, before gel purification of the  
38 expected genotyping template bands, using a Bioline Isolate II Gel & PCR Kit [BIO52059]. Forward

1 or reverse sequencing primers were each combined with 75ng of gel-purified genomic DNA  
2 genotyping sequences, and supplied to Australian Genome Research Facility for Sanger  
3 sequencing.

4

## 5 Cell culture and transfection

6 Human Embryonic Kidney (HEK293T/17; ATCC<sup>®</sup> CRL-11268) cells were maintained in Dulbecco's  
7 Modified Eagle Medium/Ham F12 media (DMEM/F12) with 10% (v/v) foetal calf serum (Gibco). Cells  
8 were incubated at 37°C, 5% CO<sub>2</sub> and passaged at 80% confluency, and tested regularly for  
9 mycoplasma contamination. Cells were transfected using Lipofectamine 2000 (Invitrogen) and  
10 plasmid DNA according to the manufacturer's instructions. Plasmids included human pLenti-C-  
11 mGFP, pLenti-TDP-43<sup>WT</sup>-C-mGFP (Origene), and pLenti-TDP-43<sup>4FL</sup>-C-mGFP, pLenti-TDP-43<sup>2KQ</sup>-C-  
12 mGFP, pLenti-TDP-43<sup>ΔNLS</sup>-C-mGFP, pLenti-TDP-43<sup>ΔNLS/4FL</sup>-C-mGFP, or pLenti-TDP-43<sup>ΔNLS/2KQL</sup>-C-  
13 mGFP (Origene, mutations by GenScript). Cells were seeded onto coverslips in 24-well plates at a  
14 density of 25,000 cells/well and incubated for 24 h. For transfections, 0.5 μg DNA and 0.75 μL  
15 Lipofectamine 2000 were used in a total of 100 μL OptiMEM (Gibco) per well. Cells were incubated  
16 for 48 h to allow protein expression from the plasmid DNA before analysis by immunoblot or  
17 immunocytochemistry.

18

## 19 Immunoblotting

20 At experiment end-points, cells were harvested and washed in ice-cold PBS, before soluble and  
21 insoluble protein fractions were extracted by sequential RIPA-buffered (50 mM Tris [pH 7.5], 150mM  
22 NaCl, 1% [v/v] NP-40, 0.5% [w/v] sodium deoxycholate, 0.1% [w/v] SDS, 1 mM EDTA, 1 mM PMSF,  
23 1 × protease/phosphatase inhibitor cocktail) and urea-buffered protein lysis, Precellys  
24 homogenisation and ultracentrifugation. RIPA-soluble protein extracts were quantified using a BCA  
25 Protein Quantification Kit (Pierce) and plates were analysed on a ClarioStar Optima plate reader  
26 (BMG Lab Technologies). 50 μg of RIPA-soluble protein and an equivalent volume of the  
27 corresponding urea-soluble fraction were analyzed by 12 % SDS-PAGE, run for 150 V for 60 min  
28 and then transferred to a nitrocellulose membrane (Li-Cor) at 100 V for 90 min. Total protein was  
29 quantified with Revert 700 total protein stain [#912-11011, Li-Cor] according to the manufacturer's  
30 instructions, before membranes were blocked in 5% (w/v) BSA Tris buffered saline (0.5 M Tris-base,  
31 1.5 M NaCl) with 0.05% (v/v) Tween-20 (TBS-T). Blots were immunolabelled overnight at 4°C with  
32 primary antibodies, including a rabbit anti-TDP-43 polyclonal antibody (PAb) [1:2000, #10782-2-AP,  
33 ProteinTech], mouse anti-myc monoclonal antibody (MAb) [1:500, #2276S (Clone 9B11), Cell  
34 Signaling Technologies]. Secondary antibodies included goat anti-mouse IRDye-800 or goat anti-  
35 rabbit IRDye-680 conjugated secondary PAbs (Li-Cor). Signals were detected by imaging with the  
36 Li-Cor Odyssey Clx Infrared Imaging System, and quantified using Li-Cor Image Studio version 3.1.

37

## 1 Live-cell imaging

2 In all live-cell imaging experiments, cell nuclei were stained with Hoechst [1:10000, #33342, Thermo  
3 Fisher] for 5 min and washed with fresh media prior to imaging. For 48 h time-course imaging of  
4 *TARDBP-mCherry(B8)* cells over-expressing TDP-43-GFP mutants, cells seeded at 30,000  
5 cells/well in 24-well plates were transferred to the Celena-X live-cell imaging microscope (Logos  
6 Biosystems), within an insulated chamber at 37°C and 5 % CO<sub>2</sub>. mCherry and GFP channels were  
7 imaged for 20 ROIs, every 2h for 48h, at 20X magnification with laser auto-focus in every ROI.  
8 Image processing was completed with FIJI and image analyses were conducted using CellProfiler  
9 version 4.2.1 (McQuin et al., 2018) using custom pipelines. For 1 h continuous imaging of *TARDBP-*  
10 *mAvicFP1(H8)* cells treated with or without sodium arsenite, 20,000 cells/dish seeded in Cellvis  
11 glass-bottom 20 mm dishes [#D29-20-1.5-N] were transferred to the Zeiss LSM 710 confocal  
12 microscope and identified with a Plan-Apochromat 63x oil objective (1.4 NA, 190µm WD, 0.19  
13 µm/pixel), blue laser diode for DAPI (405 nm), argon laser for AlexaFluor488 (488 nm), and 561 nm  
14 laser for AlexaFluor555 excitation. During imaging, cells were contained within an insulated chamber  
15 at 37°C and 5 % CO<sub>2</sub>. The GFP channel was imaged every 1 min for 1 h, at 63X magnification, with  
16 Z-stacks of 6-8 slices separated by the recommended optimal distance. Image processing was  
17 completed with FIJI, including maximum Z-projections.

18

## 19 Fluorescence recovery after photobleaching (FRAP)

20 For FRAP imaging of *TARDBP-mAvicFP1(H8)* cells treated with or without sodium arsenite or  
21 *TARDBP-mCherry(B8)* cells over-expressing TDP-43-GFP mutants, cells seeded at 20,000  
22 cells/dish in Cellvis glass-bottom 20 mm dishes [#D29-20-1.5-N] were transferred to the Zeiss LSM  
23 710 confocal microscope, were cells were contained within an insulated chamber at 37°C and 5 %  
24 CO<sub>2</sub>. Cells were identified using a Plan-Apochromat 63 x 1.4NA oil objective on the Zeiss LSM 710  
25 confocal microscope, and Zeiss ZEN software was used for data acquisition. FRAP acquisition was  
26 performed on cells within a field of view including adjacent cells of similar intensity (to control for  
27 photo-bleaching). A baseline of 3 images was acquired (using 4 % argon 488 or 561 nm laser  
28 intensity) prior to bleaching. The regions of interest on the cells were bleached for about 10 seconds  
29 (200 iterations) using 100 % argon 488 or 561 nm laser intensity over 77 imaging cycles (~2  
30 minutes), in order to completely deplete fluorescence intensity of endogenous TDP-43 within  
31 structures of interest. The image scan speed was set at 10. Data presented are representative of  
32 three or more independent experiments. Acquired data was normalised using the web-based  
33 resource tool, EasyFRAP (Koulouras et al., 2018). Mobile fractions (m.f.) and recovery time  
34 constants ( $\tau$ ) were calculated using Zen software from regions of interest of curve-fitted data.

35

## 36 Immunofluorescence staining

37 Cells on glass coverslips were fixed with 4 % paraformaldehyde in phosphate-buffered saline (PBS)  
38 for 10 min at room temperature, before blocking & permeabilisation with 3 % BSA in PBS-T (+0.1 %

1 Triton-X100) for 1 h at room temperature. Primary antibodies were diluted in blocking &  
2 permeabilisation buffer, including a rabbit anti-TDP-43 PAb [1:1000, #10782-2-AP, ProteinTech],  
3 rabbit anti-phospho TDP-43 (ser403/404) PAb [1:1000, CAC-TIP-PTD-P05, CosmoBio], and rabbit  
4 anti-G3BP1 PAb [1:500, #13057-2-AP, ProteinTech], and applied overnight at room temperature.  
5 Secondary antibodies were similarly prepared, including goat anti-Rabbit H+L AlexaFluor647 [1:500,  
6 A-21245, Life Tech], and applied for 1.5 h at room temperature. Cells were counterstained with  
7 DAPI [1:1000, #62248, Thermo Fisher] for 10 min at room temperature, mounted onto microscope  
8 slides with ProLong Gold Antifade Mountant [#P36934, ThermoFisher], and allowed to cure  
9 overnight at room temperature before microscopy.

10

## 11 Confocal microscopy

12 Confocal images were captured using either the Zeiss Laser Scanning Microscope (LSM) 510  
13 META or Zeiss LSM 710. Both are equipped with a 63x oil objective (1.4 NA, 190µm WD, 0.19  
14 µm/pixel), blue laser diode for DAPI (405 nm), argon laser for AlexaFluor488 (488 nm), 561 nm laser  
15 for AlexaFluor555, and HeNe 633 nm laser for AlexaFluor647 excitation. Images were acquired  
16 using Zen software and all acquisition parameters were applied consistently for all samples in an  
17 experimental set. Image processing and intensity profile analyses were completed with FIJI.

18

## 19 Statistical analysis

20 Data were represented as mean standard error about the mean (SEM). GraphPad Prism 9 was  
21 used for statistical analysis and preparation of graphs, with p-values < 0.05 deemed statistically  
22 significant. Live-cell imaging of nuclear TDP-43-mCherry expression over time included n=3  
23 independent repeats, recording 12 ROIs at 20X magnification for each experimental condition.  
24 FRAP experiments also included n=3 independent repeats, with at least 5 cells per replicate for  
25 each of the distinct TDP-43 assemblies studied. All immunoblot experiments included n=3  
26 independent repeats. Individual data points for each independent replicate are shown overlaid with a  
27 line at the mean. Statistically significant differences between the means were determined using a  
28 two-tailed paired t-test (where indicated in the figure legend) for comparisons between only two  
29 groups, or a one-way ANOVA with a Tukey's post hoc test for multiple comparisons in experiments  
30 with several groups.

31

## 1 References

- 2 Ayala, V., Granado-Serrano, A.B., Cacabelos, D., Naudí, A., Ilieva, E.V., Boada, J.,  
3 Caraballo-Miralles, V., Lladó, J., Ferrer, I., Pamplona, R., *et al.* 2011a. Cell stress induces  
4 TDP-43 pathological changes associated with ERK1/2 dysfunction: implications in ALS.  
5 *Acta Neuropathologica* 122, 259.
- 6 Ayala, Y.M., De Conti, L., Avendaño-Vázquez, S.E., Dhir, A., Romano, M., D'Ambrogio, A.,  
7 Tollervey, J., Ule, J., Baralle, M., Buratti, E., *et al.* 2011b. TDP-43 regulates its mRNA levels  
8 through a negative feedback loop. *Embo j* 30, 277-288.
- 9 Barmada, S.J., Skibinski, G., Korb, E., Rao, E.J., Wu, J.Y., and Finkbeiner, S. 2010.  
10 Cytoplasmic mislocalization of TDP-43 is toxic to neurons and enhanced by a mutation  
11 associated with familial amyotrophic lateral sclerosis. *J Neurosci* 30, 639-649.
- 12 Braak, H., and Del Tredici, K. 2018. Anterior Cingulate Cortex TDP-43 Pathology in  
13 Sporadic Amyotrophic Lateral Sclerosis. *J Neuropathol Exp Neurol* 77, 74-83.
- 14 Bretschneider, J., Del Tredici, K., Toledo, J.B., Robinson, J.L., Irwin, D.J., Grossman, M.,  
15 Suh, E., Van Deerlin, V.M., Wood, E.M., Baek, Y., *et al.* 2013. Stages of pTDP-43 pathology  
16 in amyotrophic lateral sclerosis. *Ann Neurol* 74, 20-38.
- 17 Buratti, E., and Baralle, F.E. 2010. The multiple roles of TDP-43 in pre-mRNA processing  
18 and gene expression regulation. *RNA Biol* 7, 420-429.
- 19 Che, M.-X., Jiang, L.-L., Li, H.-Y., Jiang, Y.-J., and Hu, H.-Y. 2015. TDP-35 sequesters  
20 TDP-43 into cytoplasmic inclusions through binding with RNA. *FEBS Lett* 589, 1920-1928.
- 21 Chen, H.J., Topp, S.D., Hui, H.S., Zacco, E., Katarya, M., McLoughlin, C., King, A., Smith,  
22 B.N., Troakes, C., Pastore, A., *et al.* 2019. RRM adjacent TARDBP mutations disrupt RNA  
23 binding and enhance TDP-43 proteinopathy. *Brain* 142, 3753-3770.
- 24 Chen, Y., and Cohen, T.J. 2019. Aggregation of the nucleic acid-binding protein TDP-43  
25 occurs via distinct routes that are coordinated with stress granule formation. *Journal of*  
26 *Biological Chemistry* 294, 3696-3706.
- 27 Chou, C.-C., Zhang, Y., Umoh, M.E., Vaughan, S.W., Lorenzini, I., Liu, F., Sayegh, M.,  
28 Donlin-Asp, P.G., Chen, Y.H., Duong, D.M., *et al.* 2018. TDP-43 pathology disrupts nuclear  
29 pore complexes and nucleocytoplasmic transport in ALS/FTD. *Nature Neuroscience* 21,  
30 228-239.
- 31 Chua, J.P., Bedi, K., Paulsen, M.T., Ljungman, M., Tank, E.M.H., Kim, E.S., McBride, J.P.,  
32 Colón-Mercado, J.M., Ward, M.E., Weisman, L.S., *et al.* 2022. Myotubularin-related  
33 phosphatase 5 is a critical determinant of autophagy in neurons. *Curr Biol*.
- 34 Cohen, T.J., Hwang, A.W., Restrepo, C.R., Yuan, C.X., Trojanowski, J.Q., and Lee, V.M.  
35 2015. An acetylation switch controls TDP-43 function and aggregation propensity. *Nat*  
36 *Commun* 6, 5845.
- 37 Cohen, T.J., Hwang, A.W., Unger, T., Trojanowski, J.Q., and Lee, V.M.Y. 2012. Redox  
38 signalling directly regulates TDP-43 via cysteine oxidation and disulphide cross-linking. *The*  
39 *EMBO Journal* 31, 1241-1252.
- 40 Colombrita, C., Zennaro, E., Fallini, C., Weber, M., Sommacal, A., Buratti, E., Silani, V., and  
41 Ratti, A. 2009. TDP-43 is recruited to stress granules in conditions of oxidative insult. *J*  
42 *Neurochem* 111, 1051-1061.
- 43 Dewey, C.M., Cenik, B., Sephton, C.F., Dries, D.R., Mayer, P., 3rd, Good, S.K., Johnson,  
44 B.A., Herz, J., and Yu, G. 2011. TDP-43 is directed to stress granules by sorbitol, a novel  
45 physiological osmotic and oxidative stressor. *Mol Cell Biol* 31, 1098-1108.
- 46 Dyer, M.S., Reale, L.A., Lewis, K.E., Walker, A.K., Dickson, T.C., Woodhouse, A., and  
47 Blizzard, C.A. 2021. Mislocalisation of TDP-43 to the cytoplasm causes cortical  
48 hyperexcitability and reduced excitatory neurotransmission in the motor cortex. *J*  
49 *Neurochem* 157, 1300-1315.
- 50 Fang, M.Y., Markmiller, S., Vu, A.Q., Javaherian, A., Dowdle, W.E., Jolivet, P., Bushway,  
51 P.J., Castello, N.A., Baral, A., Chan, M.Y., *et al.* 2019. Small-Molecule Modulation of TDP-  
52 43 Recruitment to Stress Granules Prevents Persistent TDP-43 Accumulation in ALS/FTD.  
53 *Neuron* 103, 802-819.e811.

- 1 Flores, B.N., Li, X., Malik, A.M., Martinez, J., Beg, A.A., and Barmada, S.J. 2019. An  
2 Intramolecular Salt Bridge Linking TDP43 RNA Binding, Protein Stability, and TDP43-  
3 Dependent Neurodegeneration. *Cell Reports* 27, 1133-1150.e1138.
- 4 Gasset-Rosa, F., Lu, S., Yu, H., Chen, C., Melamed, Z.e., Guo, L., Shorter, J., Da Cruz, S.,  
5 and Cleveland, D.W. 2019. Cytoplasmic TDP-43 De-mixing Independent of Stress Granules  
6 Drives Inhibition of Nuclear Import, Loss of Nuclear TDP-43, and Cell Death. *Neuron* 102,  
7 339-357.e337.
- 8 Gavrikov, A.S., Baranov, M.S., and Mishin, A.S. 2020. Live-cell nanoscopy with  
9 spontaneous blinking of conventional green fluorescent proteins. *Biochemical and*  
10 *Biophysical Research Communications* 522, 852-854.
- 11 Goh, C.W., Lee, I.C., Sundaram, J.R., George, S.E., Yusoff, P., Brush, M.H., Sze, N.S.K.,  
12 and Shenolikar, S. 2018. Chronic oxidative stress promotes GADD34-mediated  
13 phosphorylation of the TAR DNA-binding protein TDP-43, a modification linked to  
14 neurodegeneration. *Journal of Biological Chemistry* 293, 163-176.
- 15 Gu, J., Wang, C., Hu, R., Li, Y., Zhang, S., Sun, Y., Wang, Q., Li, D., Fang, Y., and Liu, C.  
16 2021. Hsp70 chaperones TDP-43 in dynamic, liquid-like phase and prevents it from amyloid  
17 aggregation. *Cell Res*.
- 18 Hallegger, M., Chakrabarti, A.M., Lee, F.C.Y., Lee, B.L., Amalietti, A.G., Odeh, H.M.,  
19 Copley, K.E., Rubien, J.D., Portz, B., Kuret, K., *et al.* 2021. TDP-43 condensation properties  
20 specify its RNA-binding and regulatory repertoire. *Cell*.
- 21 Huang, Y.-C., Lin, K.-F., He, R.-Y., Tu, P.-H., Koubek, J., Hsu, Y.-C., and Huang, J.J.-T.  
22 2013. Inhibition of TDP-43 Aggregation by Nucleic Acid Binding. *PLOS ONE* 8, e64002.
- 23 Igaz, L.M., Kwong, L.K., Lee, E.B., Chen-Plotkin, A., Swanson, E., Unger, T., Malunda, J.,  
24 Xu, Y., Winton, M.J., Trojanowski, J.Q., *et al.* 2011. Dysregulation of the ALS-associated  
25 gene TDP-43 leads to neuronal death and degeneration in mice. *J Clin Invest* 121, 726-738.
- 26 Iguchi, Y., Katsuno, M., Takagi, S., Ishigaki, S., Niwa, J., Hasegawa, M., Tanaka, F., and  
27 Sobue, G. 2012. Oxidative stress induced by glutathione depletion reproduces pathological  
28 modifications of TDP-43 linked to TDP-43 proteinopathies. *Neurobiol Dis* 45, 862-870.
- 29 Jeong, Y.H., Ling, J.P., Lin, S.Z., Donde, A.N., Braunstein, K.E., Majounie, E., Traynor, B.J.,  
30 LaClair, K.D., Lloyd, T.E., and Wong, P.C. 2017. Tdp-43 cryptic exons are highly variable  
31 between cell types. *Molecular Neurodegeneration* 12, 13.
- 32 Jiang, L.-L., Guan, W.-L., Wang, J.-Y., Zhang, S.-X., and Hu, H.-Y. 2022. RNA-assisted  
33 sequestration of RNA-binding proteins by cytoplasmic inclusions of the C-terminal 35-kDa  
34 fragment of TDP-43. *Journal of Cell Science* 135.
- 35 Kametani, F., Obi, T., Shishido, T., Akatsu, H., Murayama, S., Saito, Y., Yoshida, M., and  
36 Hasegawa, M. 2016. Mass spectrometric analysis of accumulated TDP-43 in amyotrophic  
37 lateral sclerosis brains. *Sci Rep* 6, 23281.
- 38 Keating, S.S., San Gil, R., Swanson, M.E.V., Scotter, E.L., and Walker, A.K. 2022. TDP-43  
39 pathology: From noxious assembly to therapeutic removal. *Progress in Neurobiology*,  
40 102229.
- 41 Khalfallah, Y., Kuta, R., Grasmuck, C., Prat, A., Durham, H.D., and Vande Velde, C. 2018.  
42 TDP-43 regulation of stress granule dynamics in neurodegenerative disease-relevant cell  
43 types. *Scientific Reports* 8, 7551.
- 44 Koehler, L.C., Grese, Z.R., Bastos, A.C.S., Mamede, L.D., Heyduk, T., and Ayala, Y.M.  
45 2022. TDP-43 Oligomerization and Phase Separation Properties Are Necessary for  
46 Autoregulation. *Frontiers in Neuroscience* 16.
- 47 Koulouras, G., Panagopoulos, A., Rapsomaniki, M.A., Giakoumakis, N.N., Taraviras, S.,  
48 and Lygerou, Z. 2018. EasyFRAP-web: a web-based tool for the analysis of fluorescence  
49 recovery after photobleaching data. *Nucleic acids research* 46, W467-W472.
- 50 Lambert, G.G., Depernet, H., Gotthard, G., Schultz, D.T., Navizet, I., Lambert, T., Adams,  
51 S.R., Torreblanca-Zanca, A., Chu, M., Bindels, D.S., *et al.* 2020. Aequorea's secrets  
52 revealed: New fluorescent proteins with unique properties for bioimaging and biosensing.  
53 *PLOS Biology* 18, e3000936.

- 1 Lambert, G.G., Depernet, H., Gotthard, G., Schultz, D.T., Navizet, I., Lambert, T., Bindels,  
2 D.S., Levesque, V., Moffatt, J.N., Salih, A., *et al.* 2019. *Aequorea*  
3 *victoria's* secrets. *bioRxiv*, 677344.
- 4 Lee, Y.-B., Scotter, E.L., Lee, D.-Y., Troakes, C., Mitchell, J., Rogelj, B., Gallo, J.-M., and  
5 Shaw, C.E. 2021. Cytoplasmic TDP-43 is involved in cell fate during stress recovery.  
6 *Human Molecular Genetics*.
- 7 Lee, Y.-B., Scotter, E.L., Lee, D.-Y., Troakes, C., Mitchell, J., Rogelj, B., Gallo, J.-M., and  
8 Shaw, C.E. 2022. Cytoplasmic TDP-43 is involved in cell fate during stress recovery.  
9 *Human Molecular Genetics* 31, 166-175.
- 10 Lei, Y., Zhang, Z.-F., Lei, R.-X., Wang, S., Zhuang, Y., Liu, A.-C., Wu, Y., Chen, J., Tang,  
11 J.-C., Pan, M.-X., *et al.* 2018. DJ-1 Suppresses Cytoplasmic TDP-43 Aggregation in  
12 Oxidative Stress-Induced Cell Injury. *Journal of Alzheimer's Disease* 66, 1001-1014.
- 13 Li, H.R., Chiang, W.C., Chou, P.C., Wang, W.J., and Huang, J.R. 2018. TAR DNA-binding  
14 protein 43 (TDP-43) liquid-liquid phase separation is mediated by just a few aromatic  
15 residues. *J Biol Chem* 293, 6090-6098.
- 16 Li, Y.R., King, O.D., Shorter, J., and Gitler, A.D. 2013. Stress granules as crucibles of ALS  
17 pathogenesis. *The Journal of cell biology* 201, 361-372.
- 18 Lin, Y.-C., Boone, M., Meuris, L., Lemmens, I., Van Roy, N., Soete, A., Reumers, J.,  
19 Moisse, M., Plaisance, S., Drmanac, R., *et al.* 2014. Genome dynamics of the human  
20 embryonic kidney 293 lineage in response to cell biology manipulations. *Nature*  
21 *Communications* 5, 4767.
- 22 Ling, S.C., Polymenidou, M., and Cleveland, D.W. 2013. Converging mechanisms in ALS  
23 and FTD: disrupted RNA and protein homeostasis. *Neuron* 79, 416-438.
- 24 Liu, E.Y., Russ, J., Cali, C.P., Phan, J.M., Amlie-Wolf, A., and Lee, E.B. 2019. Loss of  
25 Nuclear TDP-43 Is Associated with Decondensation of LINE Retrotransposons. *Cell reports*  
26 27, 1409-1421.e1406.
- 27 Liu-Yesucevitz, L., Bilgutay, A., Zhang, Y.-J., Vanderwyde, T., Citro, A., Mehta, T., Zaarur,  
28 N., McKee, A., Bowser, R., Sherman, M., *et al.* 2010. Tar DNA Binding Protein-43 (TDP-43)  
29 Associates with Stress Granules: Analysis of Cultured Cells and Pathological Brain Tissue.  
30 *PLOS ONE* 5, e13250.
- 31 Lu, S., Hu, J., Aladesuyi, B., Goginashvili, A., Vazquez-Sanchez, S., Diedrich, J., Gu, J.,  
32 Blum, J., Oung, S., Yu, H., *et al.* 2021. Heat shock chaperone HSPB1 regulates cytoplasmic  
33 TDP-43 phase separation and liquid-to-gel transition. *bioRxiv*, 2021.2010.2014.464447.
- 34 Maharana, S., Wang, J., Papadopoulos, D.K., Richter, D., Pozniakovsky, A., Poser, I.,  
35 Bickle, M., Rizk, S., Guillén-Boixet, J., Franzmann, T.M., *et al.* 2018. RNA buffers the phase  
36 separation behavior of prion-like RNA binding proteins. *Science* 360, 918.
- 37 Mann, J.R., Gleixner, A.M., Mauna, J.C., Gomes, E., DeChellis-Marks, M.R., Needham,  
38 P.G., Copley, K.E., Hurtle, B., Portz, B., Pyles, N.J., *et al.* 2019. RNA Binding Antagonizes  
39 Neurotoxic Phase Transitions of TDP-43. *Neuron* 102, 321-338.e328.
- 40 Markmiller, S., Sathe, S., Server, K.L., Nguyen, T.B., Fulzele, A., Cody, N., Javaherian, A.,  
41 Broski, S., Finkbeiner, S., Bennett, E.J., *et al.* 2021. Persistent mRNA localization defects  
42 and cell death in ALS neurons caused by transient cellular stress. *Cell Reports* 36, 109685.
- 43 Mazan-Mamczarz, K., Lal, A., Martindale, J.L., Kawai, T., and Gorospe, M. 2006.  
44 Translational repression by RNA-binding protein TIAR. *Mol Cell Biol* 26, 2716-2727.
- 45 McGurk, L., Gomes, E., Guo, L., Mojsilovic-Petrovic, J., Tran, V., Kalb, R.G., Shorter, J.,  
46 and Bonini, N.M. 2018. Poly(ADP-Ribose) Prevents Pathological Phase Separation of TDP-  
47 43 by Promoting Liquid Demixing and Stress Granule Localization. *Mol Cell* 71, 703-717  
48 e709.
- 49 McQuin, C., Goodman, A., Chernyshev, V., Kamentsky, L., Cimini, B.A., Karhohs, K.W.,  
50 Doan, M., Ding, L., Rafelski, S.M., Thirstrup, D., *et al.* 2018. CellProfiler 3.0: Next-  
51 generation image processing for biology. *PLoS Biol* 16, e2005970.
- 52 Mollie, A., Temirov, J., Lee, J., Coughlin, M., Kanagaraj, Anderson P., Kim, Hong J.,  
53 Mittag, T., and Taylor, J.P. 2015. Phase Separation by Low Complexity Domains Promotes  
54 Stress Granule Assembly and Drives Pathological Fibrillization. *Cell* 163, 123-133.



- 1 Nana, A.L., Sidhu, M., Gaus, S.E., Hwang, J.-H.L., Li, L., Park, Y., Kim, E.-J., Pasquini, L.,  
2 Allen, I.E., Rankin, K.P., *et al.* 2019. Neurons selectively targeted in frontotemporal  
3 dementia reveal early stage TDP-43 pathobiology. *Acta neuropathologica* 137, 27-46.
- 4 Neumann, M., Sampathu, D.M., Kwong, L.K., Truax, A.C., Micsenyi, M.C., Chou, T.T.,  
5 Bruce, J., Schuck, T., Grossman, M., Clark, C.M., *et al.* 2006. Ubiquitinated TDP-43 in  
6 Frontotemporal Lobar Degeneration and Amyotrophic Lateral Sclerosis. *Science* 314, 130-  
7 133.
- 8 Paix, A., Folkmann, A., Goldman, D.H., Kulaga, H., Grzelak, M.J., Rasoloson, D.,  
9 Paidemarry, S., Green, R., Reed, R.R., and Seydoux, G. 2017. Precision genome editing  
10 using synthesis-dependent repair of Cas9-induced DNA breaks. *Proceedings of the*  
11 *National Academy of Sciences* 114, E10745.
- 12 Pérez-Berlanga, M., Wiersma, V.I., Zbinden, A., De Vos, L., Wagner, U., Foglieni, C.,  
13 Mallona, I., Betz, K.M., Cléry, A., Weber, J., *et al.* 2022. TDP-43 oligomerization and RNA  
14 binding are codependent but their loss elicits distinct pathologies. *bioRxiv*,  
15 2022.2005.2023.493029.
- 16 Petel Légaré, V., Rampal, C.J., Gurberg, T.J.N., Harji, Z.A., Allard-Chamard, X., Rodríguez,  
17 E.C., and Armstrong, G.A.B. 2022. Development of an endogenously myc-tagged TARDBP  
18 (TDP-43) zebrafish model using the CRISPR/Cas9 system and homology directed repair.  
19 *Comparative Biochemistry and Physiology Part B: Biochemistry and Molecular Biology* 261,  
20 110756.
- 21 Polymenidou, M., Lagier-Tourenne, C., Hutt, K.R., Huelga, S.C., Moran, J., Liang, T.Y.,  
22 Ling, S.-C., Sun, E., Wancewicz, E., Mazur, C., *et al.* 2011. Long pre-mRNA depletion and  
23 RNA missplicing contribute to neuronal vulnerability from loss of TDP-43. *Nature*  
24 *neuroscience* 14, 459-468.
- 25 Porta, S., Xu, Y., Restrepo, C.R., Kwong, L.K., Zhang, B., Brown, H.J., Lee, E.B.,  
26 Trojanowski, J.Q., and Lee, V.M. 2018. Patient-derived frontotemporal lobar degeneration  
27 brain extracts induce formation and spreading of TDP-43 pathology in vivo. *Nat Commun* 9,  
28 4220.
- 29 Ratti, A., Gumina, V., Lenzi, P., Bossolasco, P., Fulceri, F., Volpe, C., Bardelli, D.,  
30 Pregnotato, F., Maraschi, A., Fornai, F., *et al.* 2020. Chronic stress induces formation of  
31 stress granules and pathological TDP-43 aggregates in human ALS fibroblasts and iPSC-  
32 motoneurons. *Neurobiology of Disease* 145, 105051.
- 33 Shenoy, J., El Mammeri, N., Dutour, A., Berbon, M., Saad, A., Lends, A., Morvan, E.,  
34 Grélard, A., Lecomte, S., Kauffmann, B., *et al.* 2020. Structural dissection of amyloid  
35 aggregates of TDP-43 and its C-terminal fragments TDP-35 and TDP-16. *FEBS J* 287,  
36 2449-2467.
- 37 Tollervey, J.R., Curk, T., Rogelj, B., Briese, M., Cereda, M., Kayikci, M., König, J.,  
38 Hortobágyi, T., Nishimura, A.L., Zupunski, V., *et al.* 2011. Characterizing the RNA targets  
39 and position-dependent splicing regulation by TDP-43. *Nat Neurosci* 14, 452-458.
- 40 Vatsavayai, S.C., Yoon, S.J., Gardner, R.C., Gendron, T.F., Vargas, J.N.S., Trujillo, A.,  
41 Pribadi, M., Phillips, J.J., Gaus, S.E., Hixson, J.D., *et al.* 2016. Timing and significance of  
42 pathological features in C9orf72 expansion-associated frontotemporal dementia. *Brain* 139,  
43 3202-3216.
- 44 Vivoli-Vega, M., Guri, P., Chiti, F., and Bemporad, F. 2020. Insight into the Folding and  
45 Dimerization Mechanisms of the N-Terminal Domain from Human TDP-43. *Int J Mol Sci* 21.
- 46 Walker, A.K., Spiller, K.J., Ge, G., Zheng, A., Xu, Y., Zhou, M., Tripathy, K., Kwong, L.K.,  
47 Trojanowski, J.Q., and Lee, V.M. 2015. Functional recovery in new mouse models of  
48 ALS/FTLD after clearance of pathological cytoplasmic TDP-43. *Acta Neuropathol* 130, 643-  
49 660.
- 50 Wang, C., Duan, Y., Duan, G., Wang, Q., Zhang, K., Deng, X., Qian, B., Gu, J., Ma, Z.,  
51 Zhang, S., *et al.* 2020. Stress Induces Dynamic, Cytotoxicity-Antagonizing TDP-43 Nuclear  
52 Bodies via Paraspeckle LncRNA NEAT1-Mediated Liquid-Liquid Phase Separation. *Mol Cell*  
53 79, 443-458.e447.

- 1 Wang, P., Wander, C.M., Yuan, C.-X., Bereman, M.S., and Cohen, T.J. 2017. Acetylation-  
2 induced TDP-43 pathology is suppressed by an HSF1-dependent chaperone program.  
3 *Nature Communications* 8, 82.
- 4 Wang, W., Wang, L., Lu, J., Siedlak, S.L., Fujioka, H., Liang, J., Jiang, S., Ma, X., Jiang, Z.,  
5 da Rocha, E.L., *et al.* 2016. The inhibition of TDP-43 mitochondrial localization blocks its  
6 neuronal toxicity. *Nature Medicine* 22, 869-878.
- 7 Watkins, J.A., Alix, J.J.P., Shaw, P.J., and Mead, R.J. 2021. Extensive phenotypic  
8 characterisation of a human TDP-43Q331K transgenic mouse model of amyotrophic lateral  
9 sclerosis (ALS). *Scientific Reports* 11, 16659.
- 10 Wei, Y., Lim, L., Wang, L., and Song, J. 2017. ALS-causing cleavages of TDP-43 abolish its  
11 RRM2 structure and unlock CTD for enhanced aggregation and toxicity. *Biochemical and*  
12 *Biophysical Research Communications* 485, 826-831.
- 13 Winton, M.J., Igaz, L.M., Wong, M.M., Kwong, L.K., Trojanowski, J.Q., and Lee, V.M.Y.  
14 2008. Disturbance of Nuclear and Cytoplasmic TAR DNA-binding Protein (TDP-43) Induces  
15 Disease-like Redistribution, Sequestration, and Aggregate Formation \*<sup><sup></sup>  
16 <sup></sup>. *Journal of Biological Chemistry* 283, 13302-13309.</sup>
- 17 Wu, L.S., Cheng, W.C., Chen, C.Y., Wu, M.C., Wang, Y.C., Tseng, Y.H., Chuang, T.J., and  
18 Shen, C.J. 2019. Transcriptopathies of pre- and post-symptomatic frontotemporal  
19 dementia-like mice with TDP-43 depletion in forebrain neurons. *Acta Neuropathol Commun*  
20 7, 50.
- 21 Yu, H., Lu, S., Gasior, K., Singh, D., Vazquez-Sanchez, S., Tapia, O., Toprani, D., Beccari,  
22 M.S., Yates, J.R., Da Cruz, S., *et al.* 2021. HSP70 chaperones RNA-free TDP-43 into  
23 anisotropic intranuclear liquid spherical shells. *Science* 371, eabb4309.
- 24 Zacco, E., Martin, S.R., Thorogate, R., and Pastore, A. 2018. The RNA-Recognition Motifs  
25 of TAR DNA-Binding Protein 43 May Play a Role in the Aberrant Self-Assembly of the  
26 Protein. *Front Mol Neurosci* 11.
- 27 Zhang, P., Fan, B., Yang, P., Temirov, J., Messing, J., Kim, H.J., and Taylor, J.P. 2019.  
28 Chronic optogenetic induction of stress granules is cytotoxic and reveals the evolution of  
29 ALS-FTD pathology. *eLife* 8, e39578.
- 30 Zhang, Y.-J., Caulfield, T., Xu, Y.-F., Gendron, T.F., Hubbard, J., Stetler, C., Sasaguri, H.,  
31 Whitelaw, E.C., Cai, S., Lee, W.C., *et al.* 2013. The dual functions of the extreme N-  
32 terminus of TDP-43 in regulating its biological activity and inclusion formation. *Human*  
33 *Molecular Genetics* 22, 3112-3122.
- 34 Zuo, X., Zhou, J., Li, Y., Wu, K., Chen, Z., Luo, Z., Zhang, X., Liang, Y., Esteban, M.A.,  
35 Zhou, Y., *et al.* 2021. TDP-43 aggregation induced by oxidative stress causes global  
36 mitochondrial imbalance in ALS. *Nature Structural & Molecular Biology*.

37

38

39

## 1 Acknowledgements

2 This work was supported by the National Health and Medical Research Council (RD Wright Career  
3 Development Fellowship 1140386 to AKW), the Ross Maclean Fellowship, and the Brazil Family  
4 Program for Neurology. SK was supported by a Thornton Foundation PhD Scholarship and a MND  
5 Research Australia PhD Scholarship top-up grant. ATB was supported a Race Against Dementia–  
6 Dementia Australia Research Fellowship. RSG was supported by a FightMND Early Career  
7 Research Fellowship. Imaging was performed at the Queensland Brain Institute's Advanced  
8 Microscopy Facility, generously supported by the Australian Government through the ARC LIEF  
9 grant LE130100078. Fluorescence-activated cell sorting was performed at the Queensland Brain  
10 Institute's Flow Cytometry Facility. We thank Rowan Tweedale and members of the  
11 Neurodegeneration Pathobiology Lab for critical evaluation of the manuscript.

12

13

## 14 Author Contributions

15 SK, RSG, and AKW conceived the research; SK, ATB, RSG, and AKW designed the project. SK,  
16 ATB and RSG performed the experiments; SK and ATB analysed the data and prepared the figures;  
17 SK, RSG, and AKW interpreted the results and wrote the manuscript. All authors read and approved  
18 the final manuscript.

19

## 20 Conflict of interest

21 The authors declare no conflict of interests

22

23

24
